# Supplementary material for: Fluorescence detected circular dichroism (FDCD) of a stereodynamic probe
Source: Royal Society of Chemistry journal article supplement (doi:10.1039/d3cc01249b), 2023-01-01
Supplement: d3cc01249b1.pdf [file d3cc01249b1.pdf]

Supporting Information for

## Fluorescence Detected Circular Dichroism (FDCD) of a Stereodynamic Probe

**Authors:** Roberto Penasa,<sup>a</sup> Federico Begato,<sup>a</sup> Giulia Licini,<sup>a</sup> Klaus Wurst,<sup>b</sup> Sergio Abbate,<sup>c</sup> Giovanna Longhi<sup>c</sup>  
and Cristiano Zonta<sup>\*a</sup>

- a. Dipartimento di Scienze Chimiche, Università degli Studi di Padova, Via Marzolo 1, 35131 - Padova – PD (Italy)
- b. Department of General, Inorganic and Theoretical Chemistry, University of Innsbruck A-6020 Innsbruck, Austria.
- c. Department of Molecular and Translational Medicine, Viale Europa 11 - 25123 Brescia – BS (Italy) and Istituto Nazionale di Ottica (INO), CNR, Research Unit of Brescia, 25123 Brescia, Italy.

\*Correspondence to: [cristiano.zonta@unipd.it](mailto:cristiano.zonta@unipd.it)

# 1. Contents

|                                                                                                                             |    |
|-----------------------------------------------------------------------------------------------------------------------------|----|
| 1. Contents                                                                                                                 | 2  |
| 2. General Methods                                                                                                          | 4  |
| 3. Synthesis and Characterization                                                                                           | 5  |
| 3.1 Synthesis of 1-(6-bromopyridin-2-yl)-N,N-bis(pyridin-2-ylmethyl)methanamine S3                                          | 5  |
| 3.2 Synthesis of 1-(6-(anthracen-1-yl)pyridin-2-yl)-N,N-bis(pyridin-2-ylmethyl)methanamine S5                               | 6  |
| 3.3 Synthesis of complex 1                                                                                                  | 7  |
| 4. <sup>1</sup> H-NMR and ESI-MS characterization                                                                           | 8  |
| 5. UV-Vis Measurements                                                                                                      | 12 |
| 5.1 Uv-Vis measurements of complex 1                                                                                        | 12 |
| 5.2 Uv-Vis titration of complex 1 with <i>R</i> -methoxyphenylacetic acid <i>R</i> -MetMan                                  | 13 |
| 5.3 Uv-Vis measurements of a selected series of carboxylic acids                                                            | 14 |
| 6. Fluorescence Measurements                                                                                                | 15 |
| 6.1 Fluorescence titration of complex 1 with <i>R</i> -methoxyphenylacetic acid <i>R</i> -MetMan                            | 16 |
| 6.2 Fluorescence measurements of the “chiroptical contaminant” <i>R</i> -BINAPO and complex 1                               | 17 |
| 6.3 Fluorescence measurements of the “chiroptical contaminant” (-)-Riboflavin and complex 1                                 | 18 |
| 7. ECD measurements                                                                                                         | 19 |
| 7.1 ECD titration complex 1 (10 <sup>-5</sup> M) with <i>R</i> -methoxyphenylacetic acid <i>R</i> -MetMan                   | 19 |
| 7.2 ECD titration of complex 1 (2×10 <sup>-4</sup> M) with <i>S</i> -methoxyphenylacetic acid <i>S</i> -MetMan              | 20 |
| 7.3 ECD sensing capability                                                                                                  | 21 |
| 7.4 ECD measurements of a selected series of carboxylic acids                                                               | 21 |
| 7.5 Enantiomeric excess calibration curve of MetMan acid versus CD amplitude                                                | 22 |
| 7.6 ECD titration of complex 1 (10 <sup>-5</sup> M) and <i>R</i> -MetMan (5×10 <sup>-4</sup> M) acid with <i>R</i> -BINAPO  | 23 |
| 8. FDCD measurements                                                                                                        | 25 |
| 8.1 FDCD titration complex 1 with <i>R</i> -methoxyphenylacetic acid <i>R</i> -MetMan                                       | 25 |
| 8.2 FDCD sensing capability                                                                                                 | 26 |
| 8.3 FDCD measurements of a selected series of carboxylic acids                                                              | 26 |
| 8.4 Enantiomeric excess calibration curve of MetMan acid versus FDCD amplitude                                              | 27 |
| 8.5 FDCD titration of complex 1 (10 <sup>-5</sup> M) and <i>R</i> -MetMan (5×10 <sup>-4</sup> M) acid with <i>R</i> -BINAPO | 28 |
| 8.6 FDCD titration of complex 1 (10 <sup>-5</sup> M) and <i>R</i> -MetMan (5×10 <sup>-4</sup> M) acid with (-)-Riboflavin   | 30 |
| 9. X-Ray measurements                                                                                                       | 32 |
| 9.1 Refinement Data for the species <i>R</i> -MetMan·1                                                                      | 32 |
| 9.2 Coordinates of the Atoms within the Unit Cell                                                                           | 33 |
| 10. DFT Calculation                                                                                                         | 38 |
| 11. References                                                                                                              | 44 |

## 2. General Methods

NMR spectra were recorded at 301 K on Bruker Avance DMX 500 MHz or Bruker Avance-300 MHz instruments. All the  $^1\text{H}$ -NMR spectra were referenced to residual isotopic impurity of  $\text{CDCl}_3$  (7.26 ppm),  $\text{DMSO-d}_6$  (2.50 ppm) or  $\text{CD}_3\text{CN}$  (1.94 ppm). The following abbreviations are used in reporting the multiplicity for NMR resonances: s=single, d=doublet, t= triplet, q=quartet, and m=multiplet. The NMR data were processed using Bruker Topspin 3.5 pl2 and MestReNova 12.0.2. ESI-MS spectra have been acquired with an Agilent Technology LC/MSD Trap SL interfaced to an Agilent 1100 binary pump. The samples were previously dissolved in acetonitrile and subsequently directly injected with a solvent flow rate of 0.05 mL/min. MS peak intensity for each analysis is reported as monoisotopic mass and the data were processed with MestReNova 12.0.2. UV-Vis spectra were recorded with a Varian Cary 50 spectrophotometer. Fluorescence spectra were recorded with an Agilent Cary Eclipse spectrophotometer. ECD and FDCD spectra were recorded with a Jasco J-1500 spectrophotometer. The spectra were processed with Spectra Manager Version 2.13.0.0 and OriginPro 2018 (64-bit) SR1 b9.5.1.195. Chemicals were purchased from Aldrich, TCI, or Apollo Scientific and used without further purification.

### 3. Synthesis and Characterization

#### 3.1 Synthesis of 1-(6-bromopyridin-2-yl)-N,N-bis(pyridin-2-ylmethyl)methanamine S3

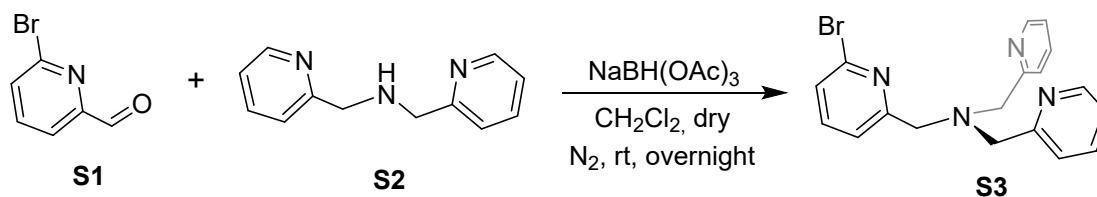

In a Schlenk apparatus, 6-bromopyridine-2-carboxaldehyde **S1** (1.55 g, 8.34 mmol) and di-(2-picolyl)amine (1.5 mL, 8.33 mmol) were dissolved in 15 mL of dry  $\text{CH}_2\text{Cl}_2$  under  $\text{N}_2$ . The reaction mixture is left under stirring for one hour. Three aliquots of the reducing agent  $\text{NaBH}(\text{OAc})_3$  (0.589, 0.603 and 0.702 g, respectively 2.78, 2.84 and 3.31 mmol) were added waiting 20 minutes between each addition. The reaction mixture is left under stirring overnight at room temperature. The solvent was removed under reduced pressure. The resulting product was dissolved in EtOAc and the solution extracted with 0.1 M solution of KOH (3x50 mL). The organic phases were dried with  $\text{Na}_2\text{SO}_4$  and the solvent was removed under reduced pressure. The resulting brown oil was precipitated by crystallization from THF/n-hexane, after storing it in the freezer ( $-20^\circ\text{C}$ ), to yield the product as pale-yellow solids (2.16g, 5.65 mmol, 67%).

$^1\text{H}$ -NMR ( $\text{CDCl}_3$ , 300 MHz);  $\delta$ (ppm): 8.58 – 8.48 (m, 2H), 7.65 (td,  $J = 7.6, 1.8$  Hz, 2H), 7.52 (dt,  $J = 20.4, 7.4$  Hz, 4H), 7.31 (d,  $J = 7.6$  Hz, 1H), 7.19 – 7.09 (m, 2H), 3.88 (d,  $J = 4.6$  Hz, 6H).

ESI-MS ( $m/z$ ): theoretical mass for  $[\text{C}_{32}\text{H}_{27}\text{N}_4+\text{H}]^+ = 369.06$   $m/z$  ; found = 369.30  $m/z$ .

### 3.2 Synthesis of 1-(6-(anthracen-1-yl)pyridin-2-yl)-N,N-bis(pyridin-2-yl)methanamine S5

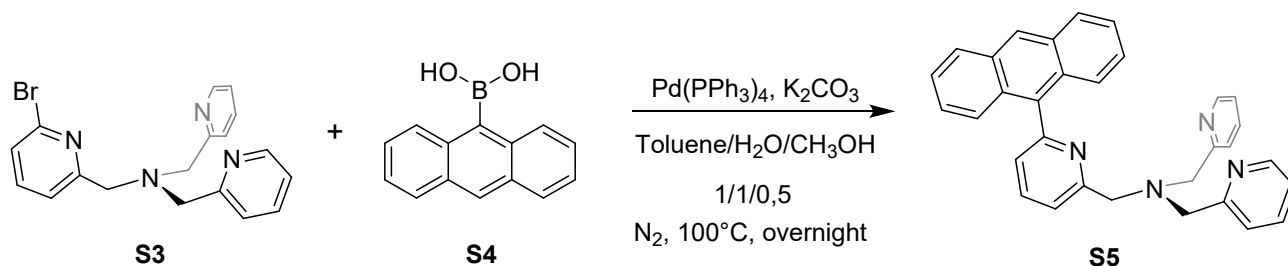

In a Schlenk apparatus, a mixture of (0.276 g, 1.24 mmol), 9-anthraceneboronic acid (0.299 g, 0.81 mmol), Pd(PPh<sub>3</sub>)<sub>4</sub> (9.39 mg, 0.82  $\mu$ mol, 1 mol%) and K<sub>2</sub>CO<sub>3</sub> (0.786 g, 5.69 mmol) was dissolved in 15 ml of H<sub>2</sub>O/toluene/CH<sub>3</sub>OH (1:1:0.5). The mixture was stirred under N<sub>2</sub> for 48 hours at 100°C. The solvent was removed under reduced pressure. The resulting orange oil was dissolved in CHCl<sub>3</sub> and the solution extracted with H<sub>2</sub>O (3x20 mL). The organic phases were dried with anhydrous Na<sub>2</sub>SO<sub>4</sub>, filtered and then the solvent was removed under reduced pressure. The resulting solid was precipitated by crystallization from THF/hexane to yield the product quantitatively as a pale-yellow solid.

<sup>1</sup>H-NMR (CDCl<sub>3</sub>, 300 MHz);  $\delta$ (ppm): 8.48 (d, J = 22.7 Hz, 1H), 8.20 – 8.09 (m, 1H), 8.08 – 7.96 (m, 3H), 7.94 – 7.83 (m, 1H), 7.79 – 7.70 (m, 1H), 7.69 – 7.28 (m, 12H), 7.19 – 7.03 (m, 2H), 4.00 (d, J = 19.3 Hz, 6H).

<sup>13</sup>C-NMR (CDCl<sub>3</sub>, 75 MHz);  $\delta$ (ppm): 159.73, 159.17, 157.54, 148.93, 136.81, 136.69, 135.21, 133.84, 131.56, 131.51, 131.25, 130.27, 130.19, 128.82, 128.75, 128.57, 128.29, 127.68, 127.62, 127.32, 127.23, 126.21, 125.85, 125.60, 125.46, 125.30, 125.20, 125.18, 124.91, 123.26, 122.14, 121.69, 77.58, 77.16, 76.74.

ESI-MS (m/z): theoretical mass for [C<sub>32</sub>H<sub>27</sub>N<sub>4</sub>+H]<sup>+</sup> = 467.22 m/z; found = 467.41 m/z.

### 3.3 Synthesis of complex 1

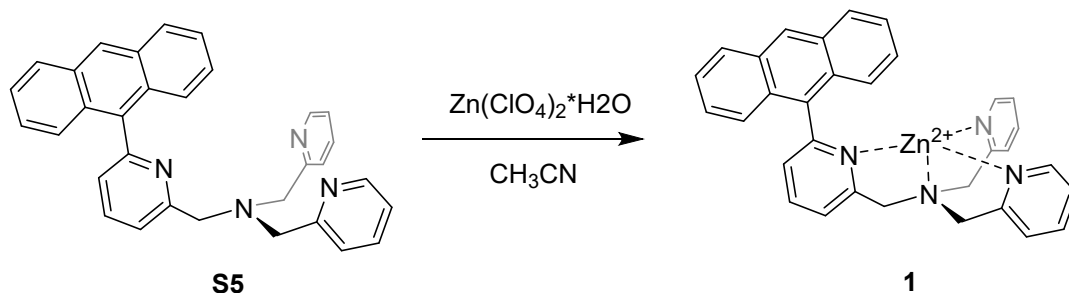

To a suspension of **TPMA** ligand (108.24 mg, 0.23 mmol) in  $\text{CH}_3\text{CN}$  (15 mL)  $\text{Zn}(\text{II})$  perchlorate hexahydrate was added (98.60 mg, 0.26 mmol). The solution was stirred at room temperature for 1 hour and the reaction was followed by  $^1\text{H}$ -NMR and ESI-MS. At the end of the reaction  $\text{Et}_2\text{O}$  (30mL) was added, obtaining the  $\text{Zn}(\text{II})$  complex quantitatively as a crystalline pale orange solid, then centrifuged and dried.

$^1\text{H}$ -NMR ( $\text{CDCl}_3$ , 300 MHz);  $\delta(\text{ppm})$ : 8.94 (s, 1H), 8.37 (t,  $J = 7.8$  Hz, 1H), 8.28 (d,  $J = 8.6$  Hz, 2H), 8.05 (td,  $J = 7.8, 1.6$  Hz, 2H), 7.83 (d,  $J = 7.8$  Hz, 2H), 7.58 (td,  $J = 14.9, 6.6$  Hz, 6H), 7.36 (dd,  $J = 7.5, 5.6$  Hz, 2H), 7.20 (d,  $J = 8.8$  Hz, 2H), 7.16 – 7.08 (m, 2H), 4.47 – 4.17 (m, 6H).

$^{13}\text{C}$ -NMR ( $\text{CDCl}_3$ , 50 MHz);  $\delta(\text{ppm})$ : 158.72, 157.93, 155.39, 148.54, 143.41, 142.68, 132.22, 132.15, 131.39, 131.06, 130.12, 130.10, 129.57, 129.56, 128.09, 127.17, 126.26, 125.85, 125.78, 125.47, 118.31, 118.26, 117.96, 57.90, 57.26.

ESI-MS ( $m/z$ ): theoretical mass for  $[\text{C}_{32}\text{H}_{26}\text{N}_4\text{Zn} + \text{COOH}]^+ = 575.14$   $m/z$ ; found = 575.11  $m/z$ ; theoretical mass for  $[\text{C}_{32}\text{H}_{26}\text{N}_4\text{Zn} + \text{Cl}]^+ = 565.11$   $m/z$ ; found = 565.10  $m/z$ .

#### 4. $^1\text{H}$ -NMR and ESI-MS characterization

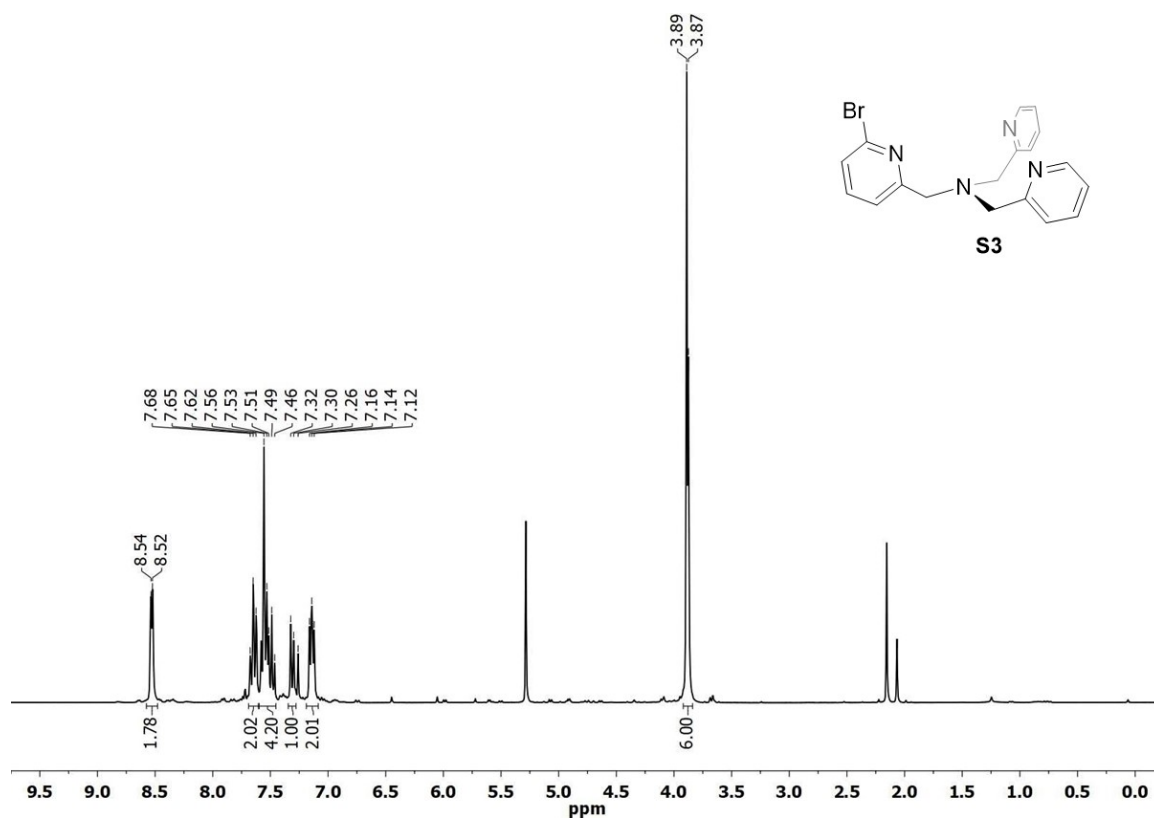

Figure S1.  $^1\text{H}$ -NMR spectrum (300 MHz, 301K,  $\text{CDCl}_3$ ) of amine S3.

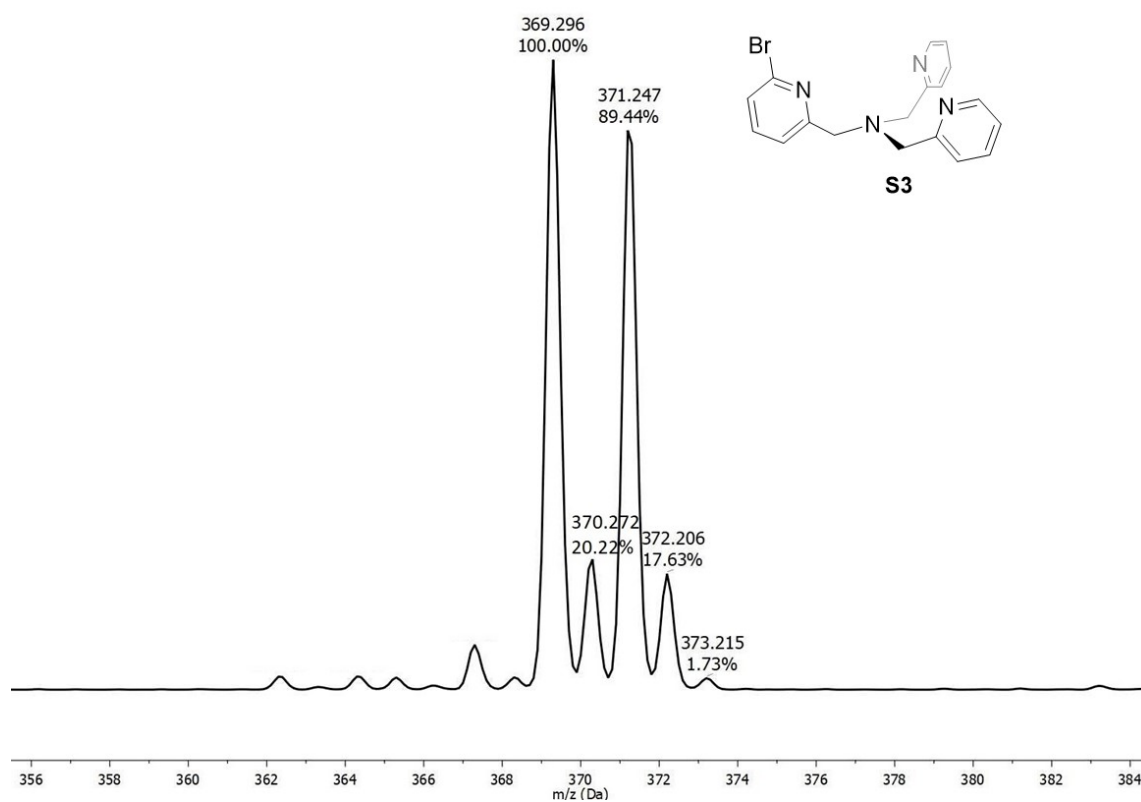

Figure S2. ESI-MS spectrum of amine S3.

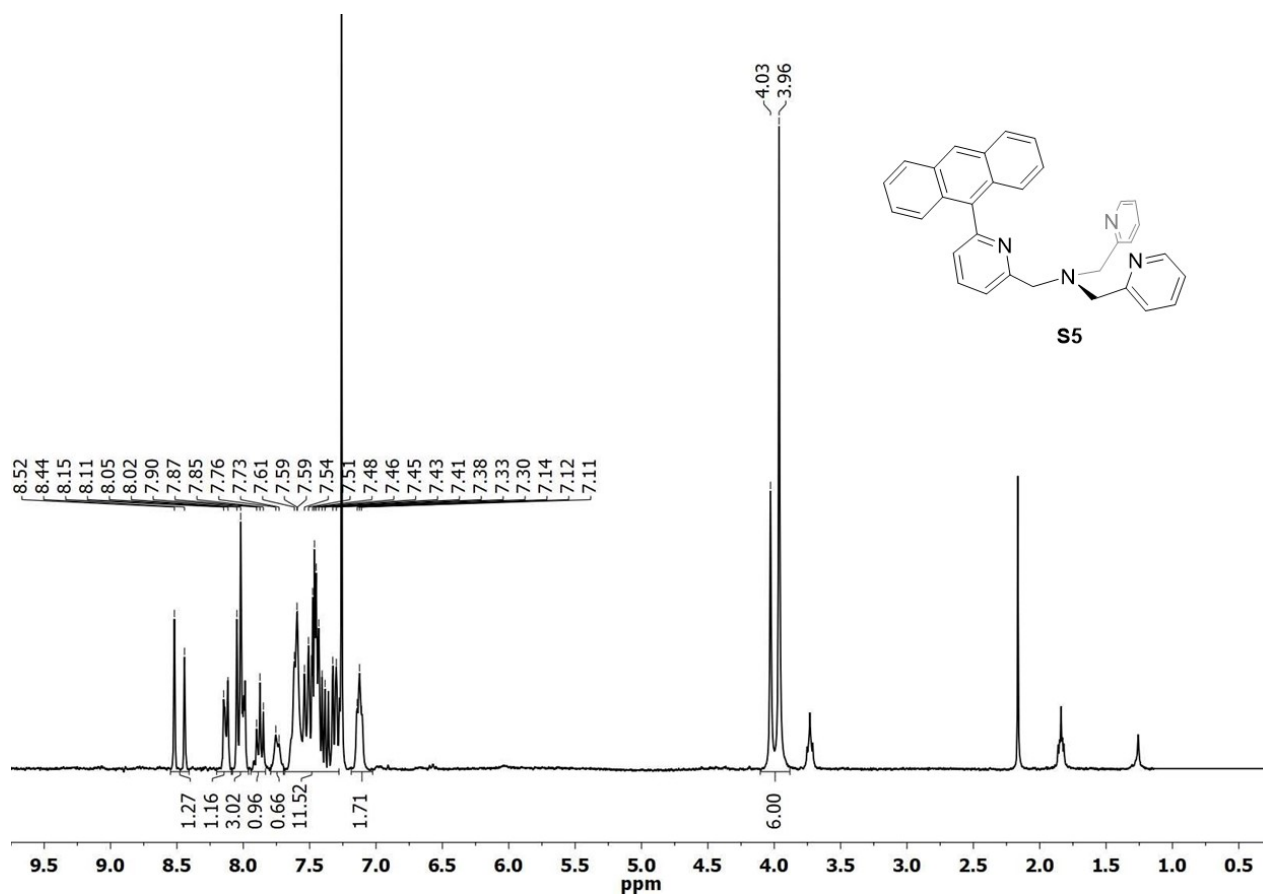

Figure S3. <sup>1</sup>H-NMR spectrum (300 MHz, 301K, CDCl<sub>3</sub>) of amine S5.

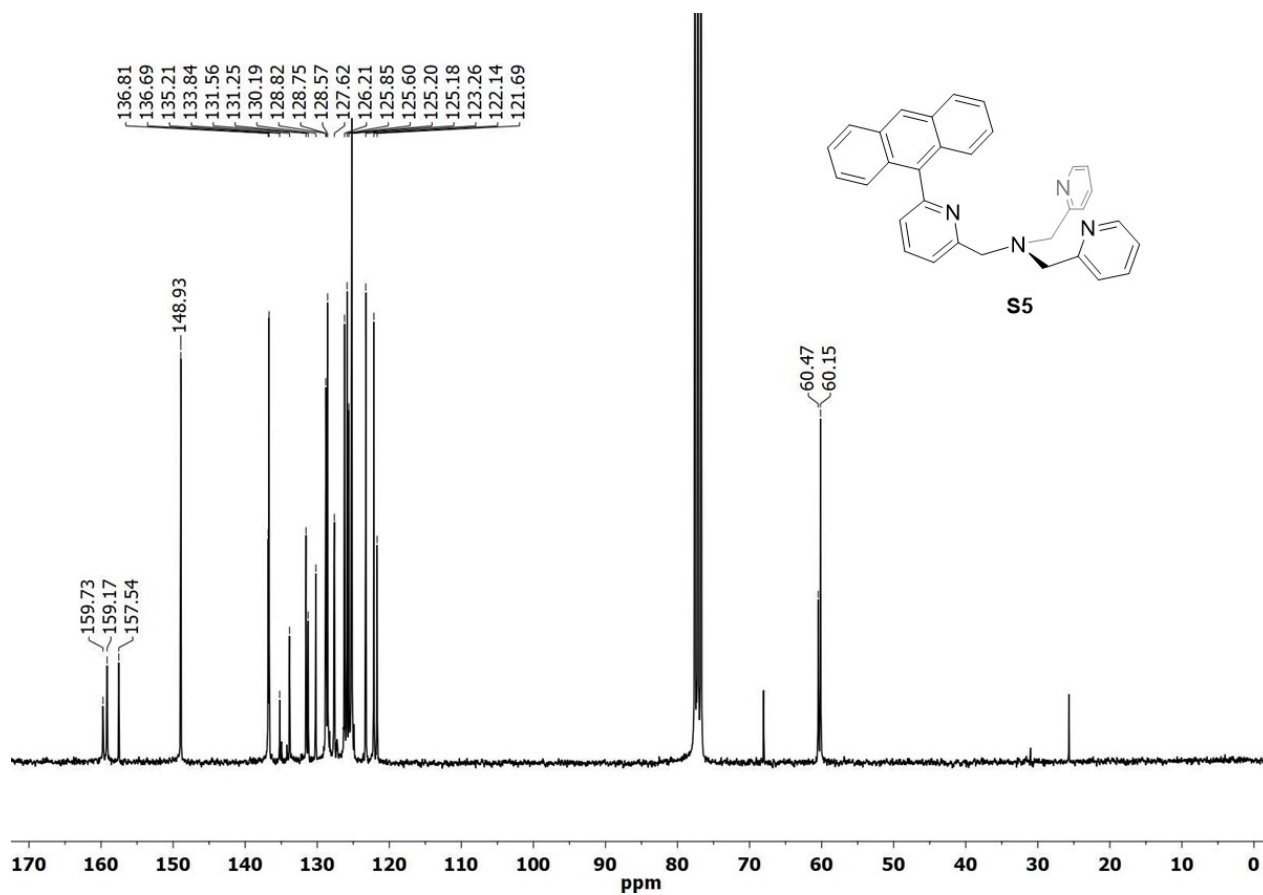

Figure S4. <sup>13</sup>C-NMR spectrum (101 MHz, 301K, CDCl<sub>3</sub>) of amine S5.

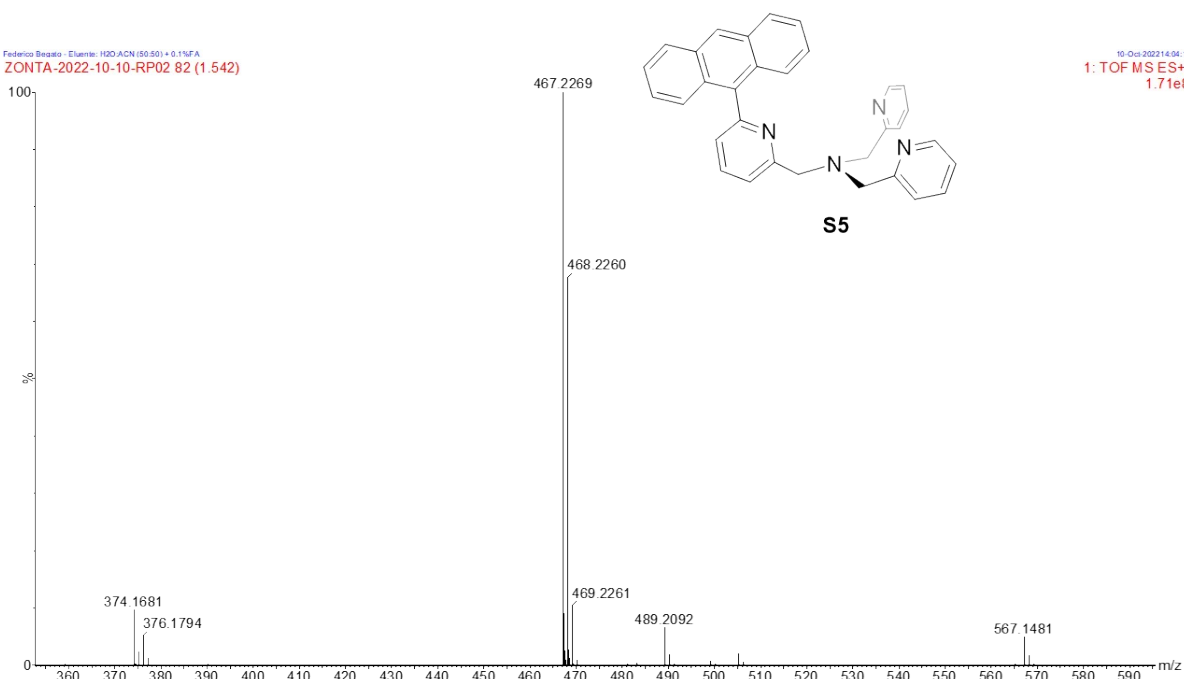

Figure S5. HRMS (ESI-TOF) spectrum of amine S5.

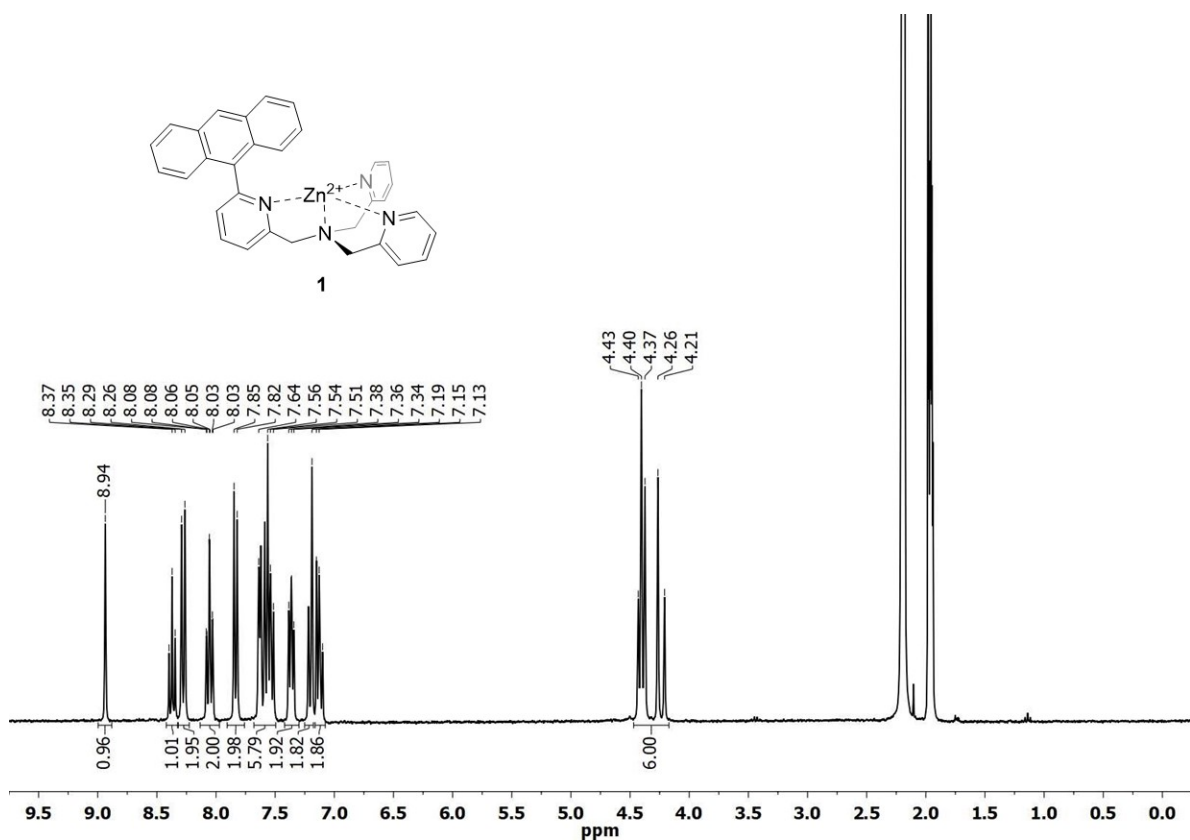

Figure S6. <sup>1</sup>H-NMR spectrum (300 MHz, 301K, CD<sub>3</sub>CN) of complex 1.

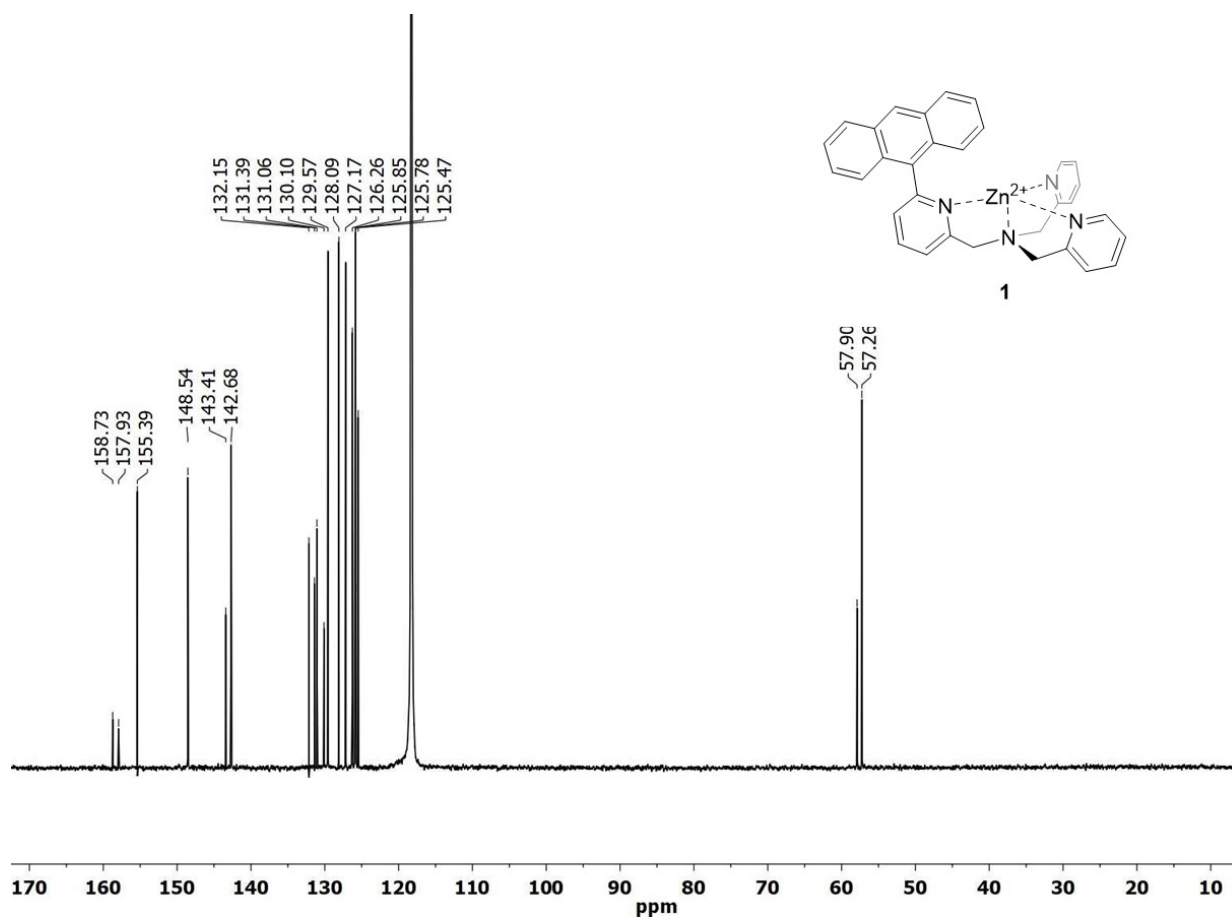

Figure S7. <sup>13</sup>C-NMR spectrum (101 MHz, 301K, CD<sub>3</sub>CN) of complex 1.

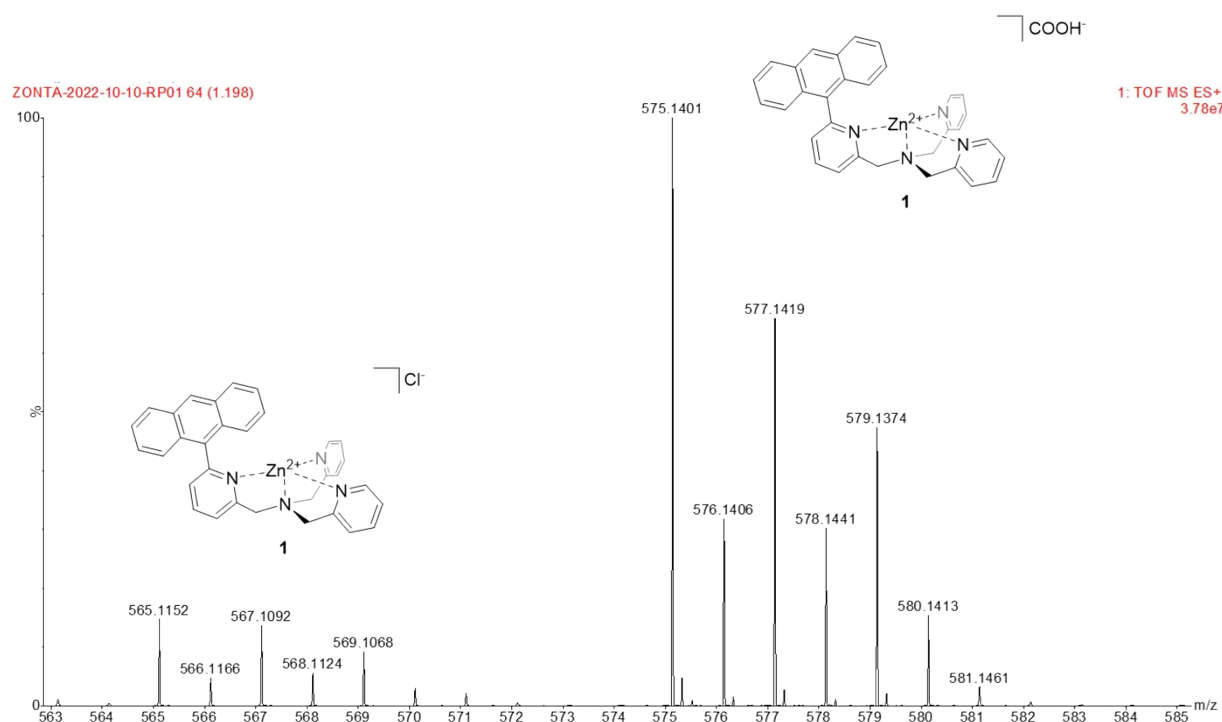

Figure S8. HRMS (ESI-TOF) spectrum of complex 1.

## 5. UV-Vis Measurements

### 5.1 Uv-Vis measurements of complex 1

The solution for the UV-Vis measure was prepared from the synthesized complex by dilution in a buffer solution composed by CH<sub>3</sub>CN/H<sub>2</sub>O 3:1 with HEPES 20 mM to obtain a final concentration equal to  $4.0 \times 10^{-5}$  M (pH=7.4). The spectra were collected with a 1 cm cuvette path length in the range 210 - 400 nm. The UV-Vis spectra is shown in *Figure S9*.

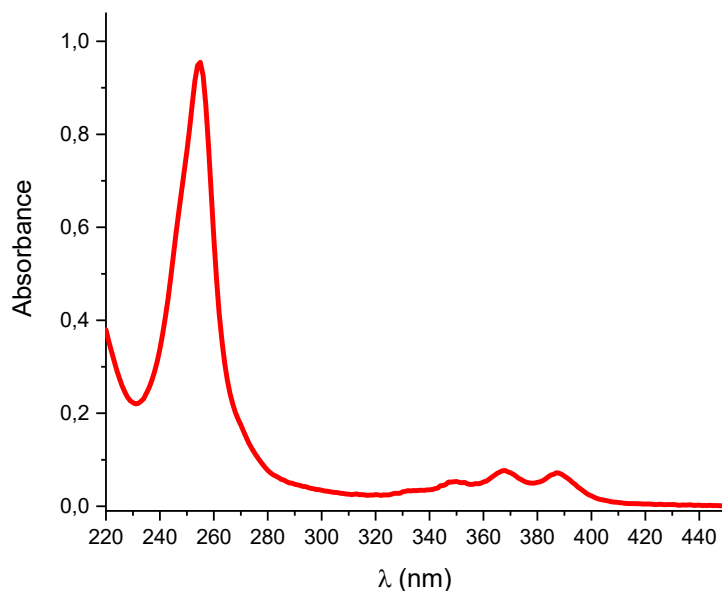

**Figure S9.** UV-Vis spectrum of complex 1 ( $4 \times 10^{-5}$  M) within the range 220 – 440 nm.

## 5.2 Uv-Vis titration of complex 1 with *R*-methoxyphenylacetic acid *R*-MetMan

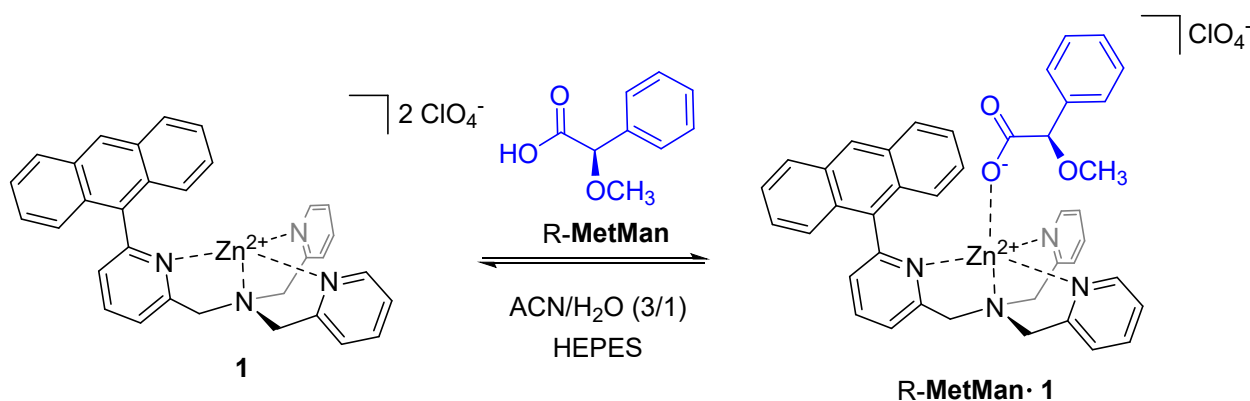

The solution for the fluorescent titration was prepared from the synthesized complex by dilution in  $\text{CH}_3\text{CN}/\text{H}_2\text{O}$  3:1 with HEPES 20 mM (pH=7.4) to a final concentration of  $4 \times 10^{-5}$  M. The methoxyphenylacetic acid was prepared from the solid by dilution with a solution  $4 \times 10^{-5}$  M of the complex to a concentration in methoxyphenylacetic acid of  $10^{-3}$  M. The complex solution was subsequently titrated with the solution of the acid until a H:G ratio equal to 1:12.8.

The Uv-Vis titration spectra, shown in *Figure S10*, remain approximately constant during the titration, indicating that the complexation of the acid does not have a remarkable impact on the absorbance properties of the complex.

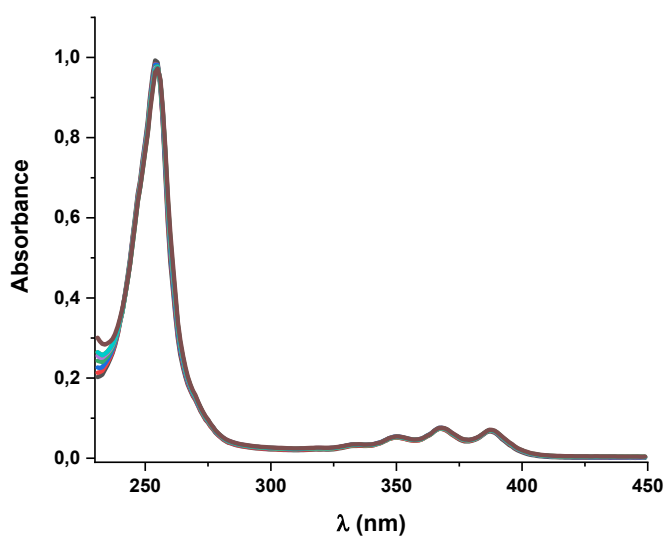

**Figure S10.** Uv-Vis spectra recorded for the titration of the complex **1** ( $4.0 \times 10^{-5}$  M) with *R*-MetMan. The spectra were recorded between 220 and 450 nm for increasing aliquots of the chiral acid ranging from 0 to 12.8 eq. Eight spectra were recorded, respectively with 0.0, 0.2, 0.4, 0.8, 1.6, 3.2, 6.4, 12.8 equivalents of acid added to the complex solution.

### 5.3 Uv-Vis measurements of a selected series of carboxylic acids

A solution of complex **1** were prepared by dilution in CH<sub>3</sub>CN/H<sub>2</sub>O 3:1 with HEPES 20 mM (pH=7.4) to a final concentration of  $4.0 \times 10^{-5}$  M. The solution of the acid was prepared by dilution within a solution  $4.0 \times 10^{-5}$  M of complex to a concentration of the chiral acid equal to  $2,5 \times 10^{-3}$  M. For the measurements, a defined aliquot of the acid was added to the complex to obtain a concentration of the acid equal to  $5 \times 10^{-4}$  M. The Uv-Vis output were recorded with a 1 cm cuvette path length within the range 250 – 350 nm (*Figure S11*).

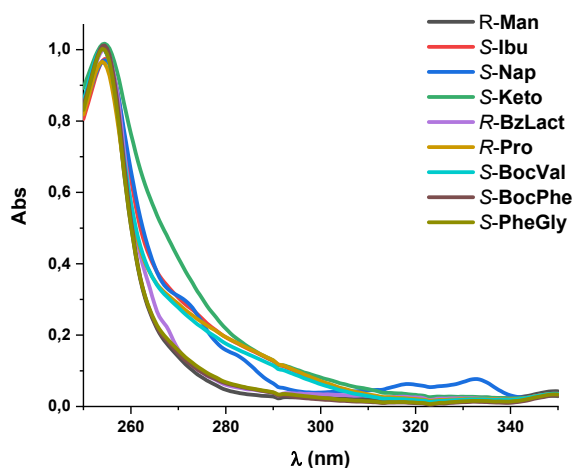

**Figure S11.** Uv-Vis spectra superposition of the host **1** at concentration of  $4.0 \times 10^{-5}$  M with the nine carboxylates tested at concentration of  $5 \times 10^{-4}$  M.

## 6. Fluorescence Measurements

The solution for the fluorescent measurements was prepared from the synthesized complex by dilution in CH<sub>3</sub>CN/H<sub>2</sub>O 3:1 with HEPES 20 mM (pH=7.4) to a final concentration of  $5 \times 10^{-6}$  M. The measure was performed using a 1.0 cm cuvette path length. It was recorded both the excitation fluorescence and the emission fluorescence spectra (*Figure S12* and *Figure S13* respectively). The first were recorded between 220 and 450 nm by setting an emission wavelength equal to 460 nm. Instead, the second were recorded between 260 and 600 nm by setting an excitation wavelength equal to 250 nm.

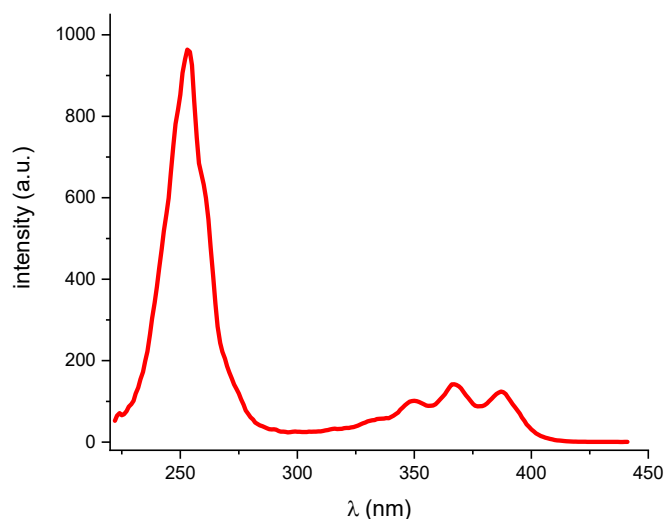

**Figure S12.** Fluorescence excitation spectrum of complex **1** ( $5 \times 10^{-6}$  M) within the range 200-450 nm. Both the excitation and emission slits were fixed at 5 nm.

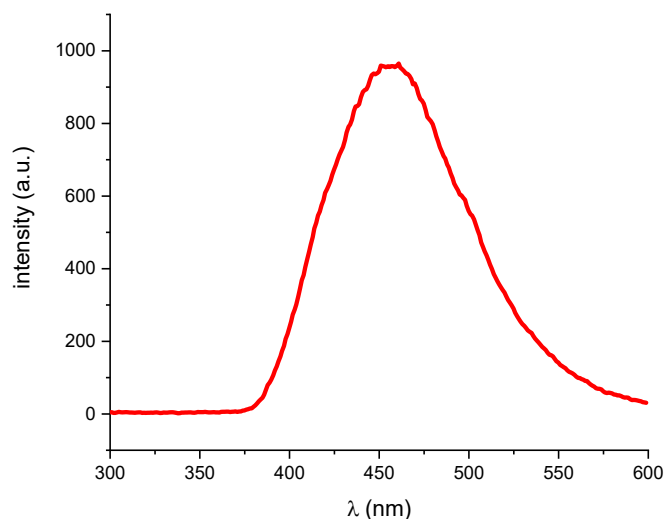

**Figure S13.** Fluorescence emission spectrum of complex **1** ( $5 \times 10^{-6}$  M) within the range 300-600 nm. Both the excitation and emission slits were fixed at 5 nm.

## 6.1 Fluorescence titration of complex 1 with *R*-methoxyphenylacetic acid *R*-MetMan



The solution for the fluorescent titration was prepared from the synthesized complex by dilution in  $\text{CH}_3\text{CN}/\text{H}_2\text{O}$  3:1 with HEPES 20 mM (pH=7.4) to a final concentration of  $5 \times 10^{-6}$  M. The methoxyphenylacetic acid was prepared from the solid by dilution with a solution  $5 \times 10^{-6}$  M of the complex to a concentration in methoxyphenylacetic acid of  $5 \times 10^{-4}$  M. The complex solution was subsequently titrated with the solution of the acid until a H:G ratio equal to 1:12.8.

The fluorescence titration spectra are shown in *Figure S14*. Both the excitation and the emission of fluorescence spectra remain approximately constant during the titration, indicating that the complexation of the acid does not have a remarkable impact on the fluorescent properties of the complex. Moreover, the excitation fluorescence spectra show the same bands with the same relative intensities of the absorbance spectra of the complex (*Figure S9*). This is expected since the zinc complex is the only species that absorbs and emits in solution.

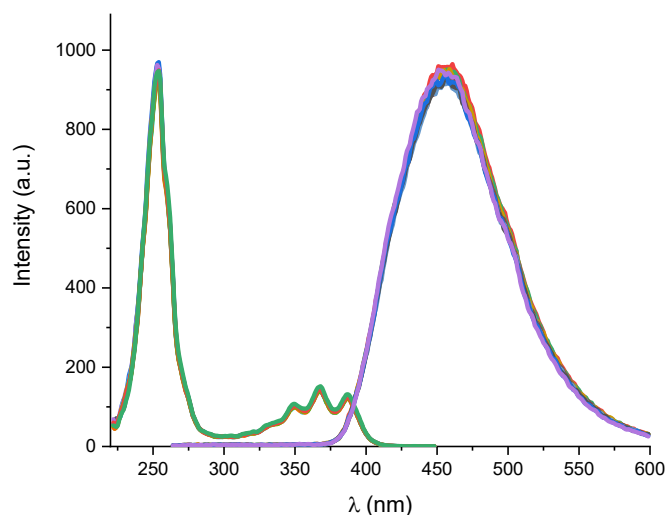

**Figure S14.** Fluorescent excitation (*left*) and emission (*right*) spectra recorded for the titration of the complex **1** ( $5.0 \times 10^{-6}$  M) with *R*-MetMan. The spectra were recorded between 220 and 600 nm for increasing aliquots of the chiral acid ranging from 0 to 12.8 eq. Eight excitation and emission spectra were recorded, respectively with 0.0, 0.2, 0.4, 0.8, 1.6, 3.2, 6.4, 12.8 equivalents of acid added to the complex solution. Both the excitation and emission slits were fixed at 5 nm.

## 6.2 Fluorescence measurements in the presence of the “chiroptical contaminant” *R*-BINAPO and complex **1**

The fluorescence measurements of the chiroptical contaminant chosen for the CD and FD CD experiment was performed to check if the complex **1** is the only emitting species above 420 nm (filter used for FD CD measurements).

A solution containing complex **1** ( $10^{-5}$  M) and *R*-BINAPO ( $5 \times 10^{-4}$  M) was prepared and analysed. The *R*-BINAPO species has an excitation band with a maximum at 252 nm while an emission band centred at around 350 nm (Figure S15).

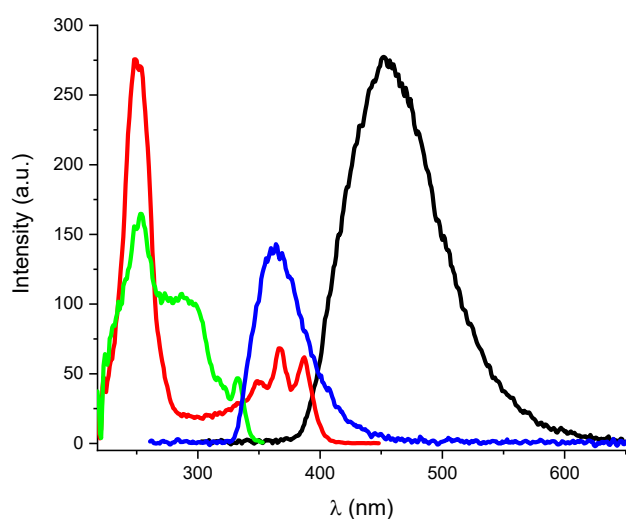

**Figure S15.** Fluorescence excitation spectra of complex **1** (red,  $10^{-5}$  M) and *R*-BINAPO (green,  $5 \times 10^{-4}$  M) and fluorescence emission spectra of complex **1** (black,  $10^{-5}$  M) and *R*-BINAPO (blue,  $5 \times 10^{-4}$  M). The excitation slit was fixed at 2,5 nm while the emission slit at 5,0 nm. ( $5 \times 10^{-6}$  M)

### 6.3 Fluorescence measurements in the presence of the “chiroptical contaminant” (-)-Riboflavin and complex 1

A second chiroptical contaminant was tested. This one is emitting within the range of the probe (400–550 nm). The fluorescence properties of the **(-)-Riboflavin** was tested preparing a solution by dilution in CH<sub>3</sub>CN/H<sub>2</sub>O 3:1 with HEPES 20 mM (pH=7.4) to a final concentration of 10<sup>-5</sup> M (*Figure S16*).

The interference the Riboflavin to the fluorescence of the complex **1** was tested through a titration experiment. The solution for the fluorescent titration was prepared from the synthesized complex by dilution in CH<sub>3</sub>CN/H<sub>2</sub>O 3:1 with HEPES 20 mM (pH=7.4) to a final concentration of 10<sup>-5</sup> M. The **(-)-Riboflavin** solution was prepared from the solid by dilution with a solution 10<sup>-5</sup> M of the complex to a concentration in **(-)-Riboflavin** of 5×10<sup>-3</sup> M. The complex solution was subsequently titrated until a final concentration of the contaminant equal to 5×10<sup>-3</sup> M. At each step of the titration was recorded the excitation and emission spectra of both the complex **1** and the **(-)-Riboflavin** contaminant. This was done by setting different emission (455 and 520 nm for the complex **1** and the **(-)-Riboflavin** respectively) and excitation (250 and 460 nm for the complex **1** and the **(-)-Riboflavin** respectively) wavelength (*Figure S17*).

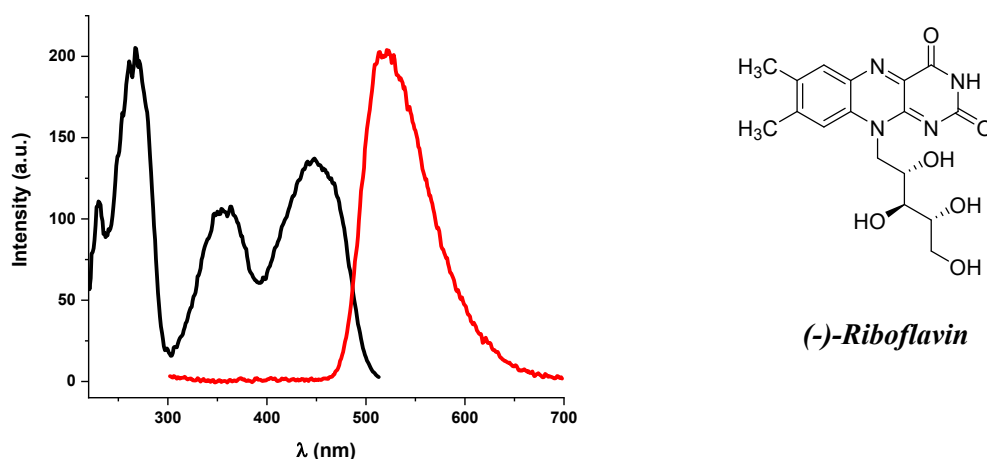

**Figure S16.** Fluorescence excitation (black) and emission (red) spectra of **(-)-Riboflavin** (5×10<sup>-5</sup> M). Both the excitation and emission slits were fixed at 2,5 nm.

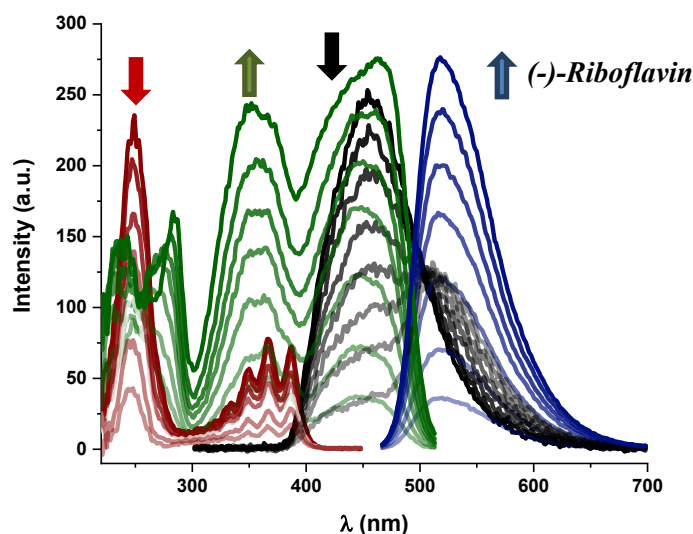

**Figure S17.** Fluorescent excitation (*left*, red and green for the complex **1** and **(-)-Riboflavin** respectively) and emission (*right*, black and blue for the complex **1** and **(-)-Riboflavin** respectively) spectra recorded for the titration of the complex **1** (10<sup>-5</sup> M) with **(-)-Riboflavin**. The spectra were recorded between 220 and 700 nm for increasing aliquots of the chiral chiroptical contaminant ranging from 0 M to 5×10<sup>-4</sup> M.

## 7. ECD measurements

### 7.1 ECD titration complex **1** ( $10^{-5}$ M) with *R*-methoxyphenylacetic acid *R*-MetMan

The solution for the circular dichroism measurements was prepared from the synthesized complex by dilution in  $\text{CH}_3\text{CN}/\text{H}_2\text{O}$  3:1 with HEPES 20 mM (pH=7.4) to a final concentration of  $10^{-5}$  M. The solution of the acid was prepared by dilution within a solution  $10^{-5}$  M of complex to a concentration of the chiral acid equal to  $2 \times 10^{-4}$  M. A defined aliquot of the acid solution was then added to the complex in the range H:G ratio equal to 1:10. CD data were recorded with a 1.0 cm cuvette path length within the range 250 – 320 nm. CD spectra and fitting are reported in *Figure S18* while the binding constant value was found to be  $3000 \text{ M}^{-1} \pm 300 \text{ M}^{-1}$ .

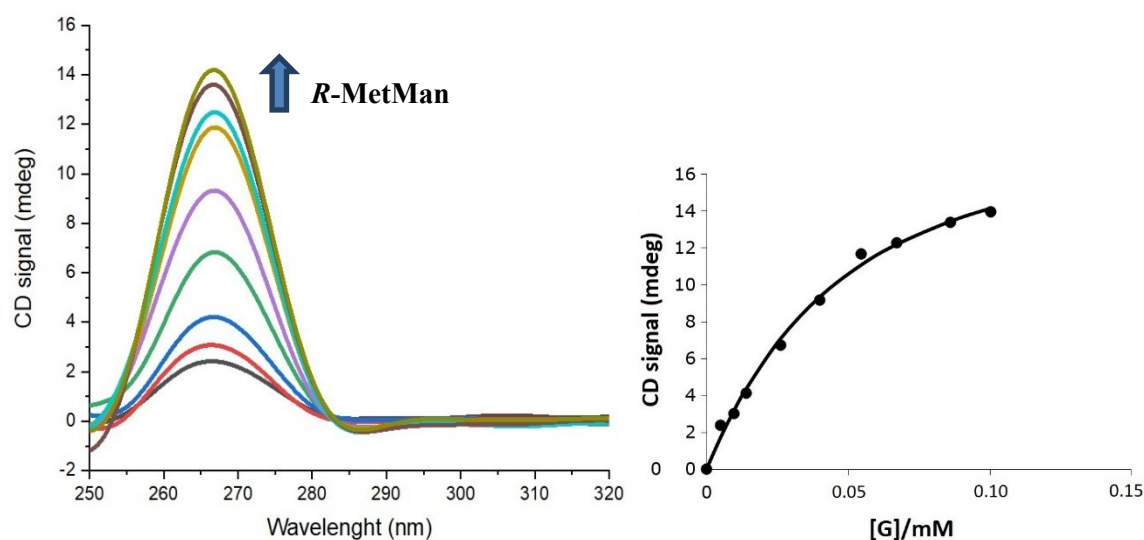

**Figure S18.** ECD spectra (left) and fitting (right) for the *R*-MetMan·**1** host-guest titration. The analyzed solution of **1** was  $10^{-5}$  M with increasing concentration of *R*-MetMan as reported in the plot; the cuvette used for the measurements was 1 cm. The solutions were prepared in buffer 3:1  $\text{H}_2\text{O}/\text{CH}_3\text{CN}$  with HEPES 20 mmol. The sample compartment was thermostated at 298 K. The fitting was performed considering a 1:1 binding model.

## 7.2 ECD titration of complex **1** ( $2 \times 10^{-4}$ M) with *S*-methoxyphenylacetic acid *S*-MetMan

The experiment showed in the previous section was repeated with a higher host concentration, this time to verify the presence of the signal at 300 nm observed in the FDCD titration measurement (see section 7.1). The solution was prepared from the synthesized complex by dilution in  $\text{CH}_3\text{CN}/\text{H}_2\text{O}$  3:1 with HEPES 20 mM (pH=7.4) to a final concentration of  $2 \times 10^{-4}$  M. The solution of the acid was prepared by dilution within a solution  $2 \times 10^{-4}$  M of complex to a concentration of the chiral acid equal to  $2 \times 10^{-3}$  M. A defined aliquot of the acid solution was then added to the complex to obtain a H:G ratio equal to 1:10. The CD data were recorded with a 1.0 cm cuvette path length within the range 275 – 420 nm. CD spectra and fitting are reported in *Figure S19*. The broad signal between 290 – 410 nm is clearly visible upon the addition of the chiral *S*-MetMan acid. This is also in good accordance with the theoretical spectra prediction showed in section 10.

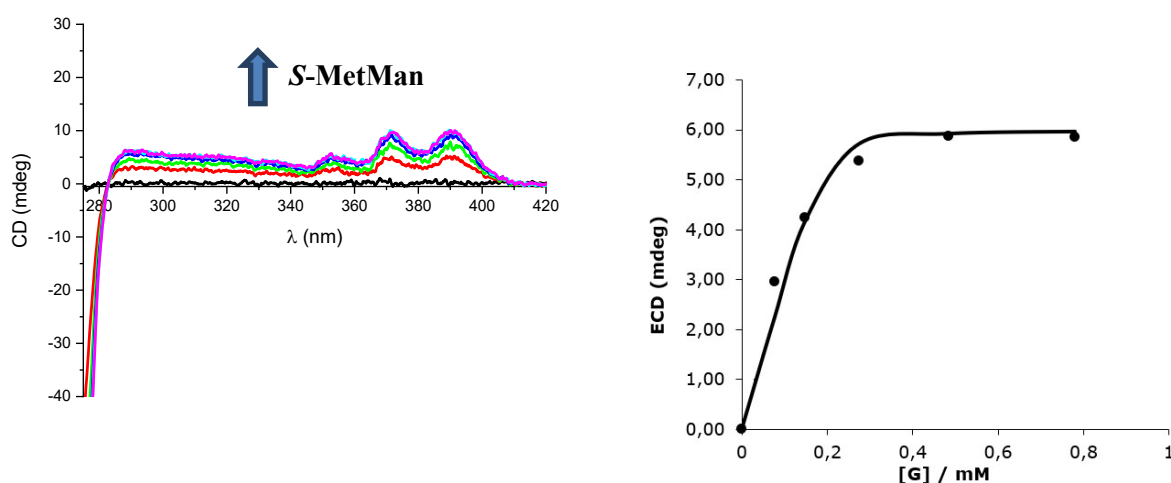

**Figure S19.** ECD spectra (left) and fitting (right) for the *S*-MetMan·**1** host-guest titration. The analyzed solution of **1** was  $2 \times 10^{-4}$  M (2 mL) while the H:G ratio was 1:10 and the cuvette used for the measurements was 1 cm. The solutions were prepared in buffer 3:1  $\text{H}_2\text{O}/\text{CH}_3\text{CN}$  with HEPES 20 mmol. The sample compartment was thermostated at 298 K.

### 7.3 ECD sensing capability

Three solutions at different concentration of the complex **1** were prepared by dilution in CH<sub>3</sub>CN/H<sub>2</sub>O 3:1 with HEPES 20 mM (pH=7.4) to a final concentration equal to 10<sup>-5</sup> M, 10<sup>-6</sup> M, and 10<sup>-7</sup> M. The solution of the acid was prepared by dilution to a concentration of the chiral acid equal to 2,5×10<sup>-3</sup> M. For the measurements, a defined aliquot of the acid was added to the complex to obtain a concentration of the acid equal to 5×10<sup>-4</sup> M. The CD output were recorded with a 1 cm cuvette path length within the range 250 – 320 nm (*Figure 1b*).

### 7.4 ECD measurements of a selected series of carboxylic acids

A solution of complex **1** were prepared by dilution in CH<sub>3</sub>CN/H<sub>2</sub>O 3:1 with HEPES 20 mM (pH=7.4) to a final concentration of 10<sup>-5</sup> M. The solution of the acid was prepared by dilution within a solution 10<sup>-5</sup> M of complex to a concentration of the chiral acid equal to 2,5×10<sup>-3</sup> M. For the measurements, a defined aliquot of the acid was added to the complex to obtain a concentration of the acid equal to 5×10<sup>-4</sup> M. The HT(V) value of the phototube was fixed to 570 for all the measurements. The CD output were recorded with a 1 cm cuvette path length within the range 250 – 320 nm (*Figure 1c*)

## 7.5 Enantiomeric excess calibration curve of MetMan acid versus CD amplitude

The limit of complex **1** to act as stereodynamic probe was tested preparing a calibration curve with a concentration of **1** equal to  $10^{-6}$  M. Six solutions were prepared using complex **1** at  $10^{-6}$  M and the acid **MetMan**  $5 \times 10^{-4}$  M at six different *e.e.* (+100%, +75%, +25%, -25%, -75%, -100%).

Eight curves were recorded and a linear relationship was obtained between the ellipticity value recorded by the ECD spectrometer (mean value between 265 and 275 nm) and the *e.e.*(%) of the chiral acid **MetMan** (Figure S20). The measurements were repeated three times. From these, the calibration line and the confidence band were obtained from the least squares regression analysis.

a)

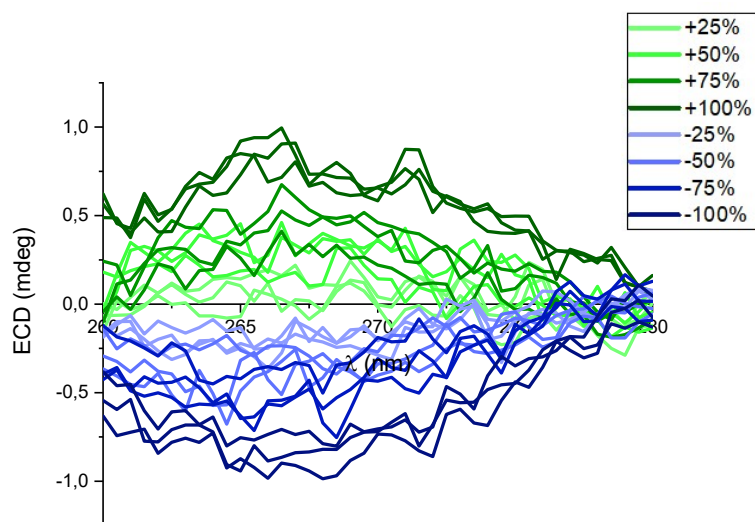

b)

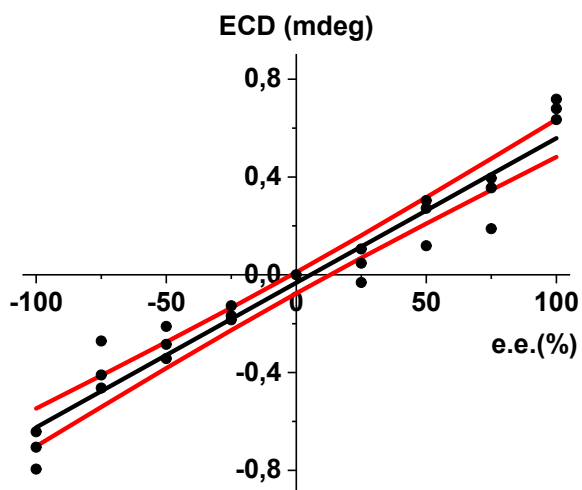

**Figure S20.** a) ECD spectra between 260 and 280 nm of complex **1** ( $10^{-6}$  M) in the presence of **MetMan** acid ( $5 \times 10^{-4}$  M) at different enantiopurities. b) Calibration curve (black line) and confidence bands (red lines) of **MetMan** acid *ee*(%) with respect to the ellipticity mean value recorded between 265-275 nm. The fitting equation curve is  $y = 0.0059x + 0.033$ ,  $R^2 = 0.94$ .

## 7.6 ECD titration of complex **1** ( $10^{-5}$ M) and *R*-MetMan ( $5 \times 10^{-4}$ M) acid with *R*-BINAPO

ECD titration of complex **1** and *R*(or *S*)-MetMan acid with additional aliquots of *R*-BINAPO was performed to test the influence of this interfering species on the CD output of the adduct *R*-MetMan•**1**. A solution containing complex **1** ( $10^{-5}$ ) and *R*(or *S*)-MetMan ( $5 \times 10^{-4}$  M) acid was prepared by dilution from the pure compounds in CH<sub>3</sub>CN/H<sub>2</sub>O 3:1 with HEPES 20 mM (pH=7.4) as previously described. The solution of *R*-BINAPO was prepared by dilution within a solution  $10^{-5}$  M of complex to a concentration of *R*-BINAPO equal to  $2 \times 10^{-3}$  M. A defined aliquot *R*-BINAPO solution was then added to the solution containing complex **1** and *R*(or *S*)-MetMan to obtain a final concentration of *R*-BINAPO equal to  $5 \times 10^{-4}$  M. The CD output were recorded with a 1.0 cm cuvette path length within the range 250 – 350 nm. G-value, CD spectra (mdeg), and Abs response are reported in Figure S21.

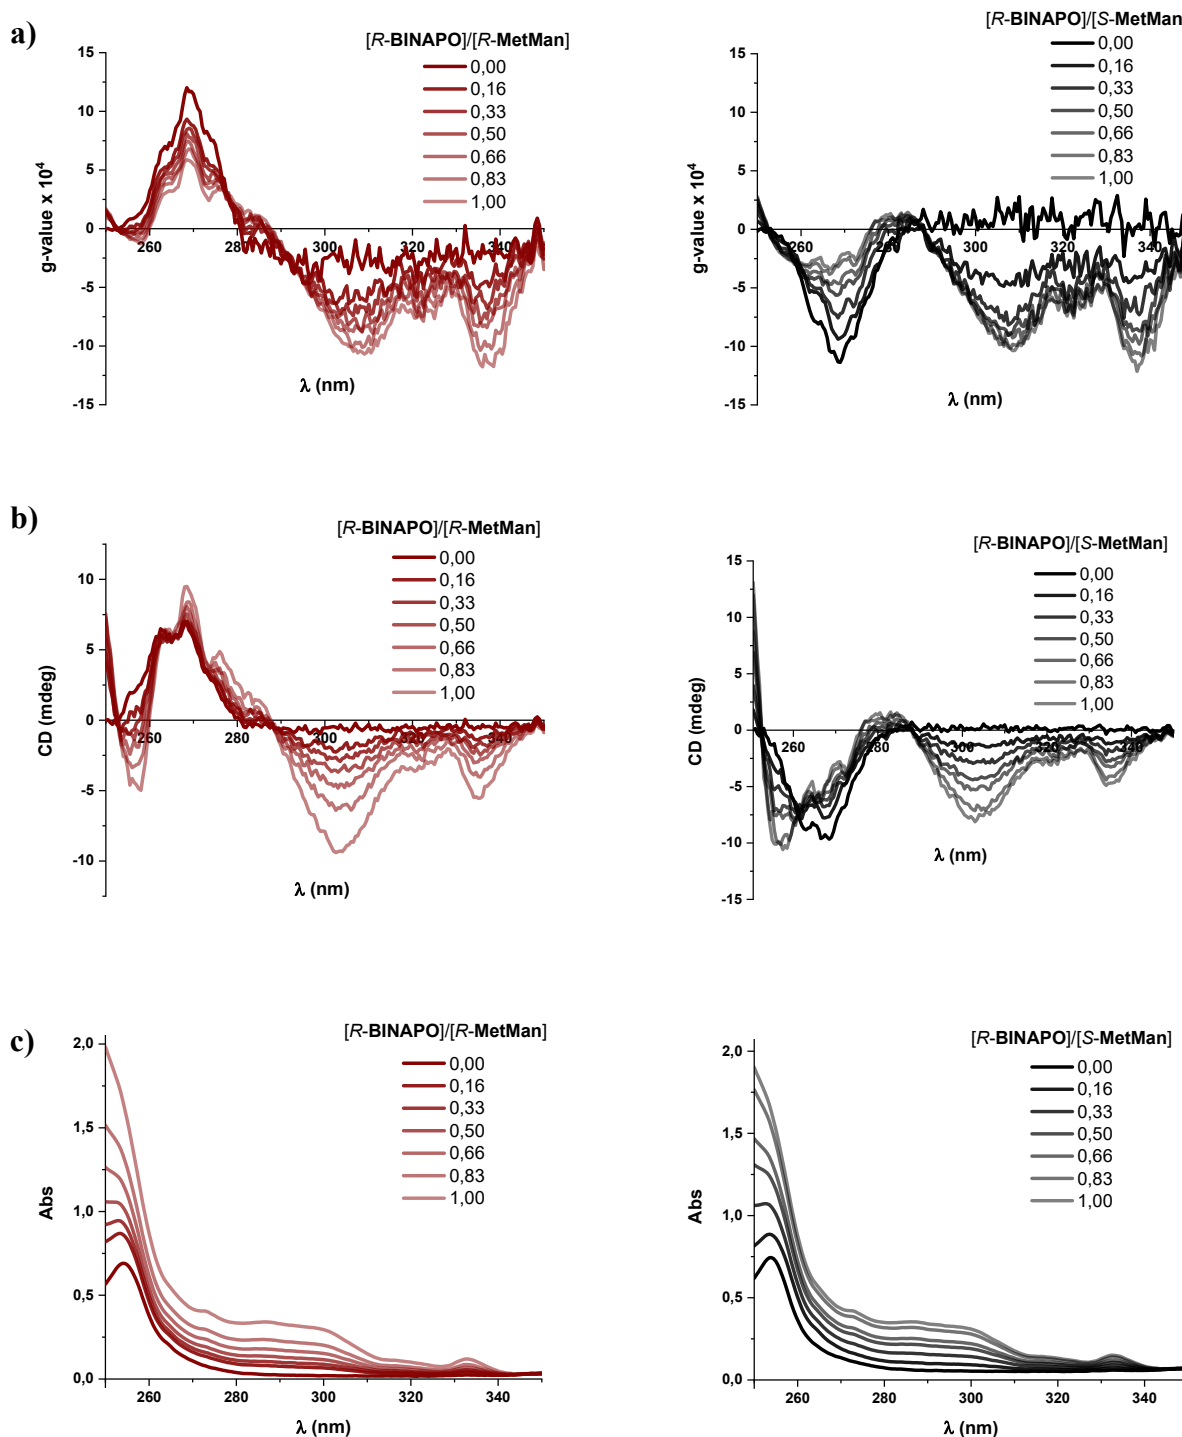

**Figure S21.** a) g-value, b) CD (mdeg), and c) Abs spectra for the titration of the host **1** ( $10^{-5}$  M) and *R*(left) or *S*(right)-MetMan acid ( $5 \times 10^{-4}$  M) with additional aliquots of *R*-BINAPO (from 0 M (solid line) to  $5 \times 10^{-4}$  M (faded line)).

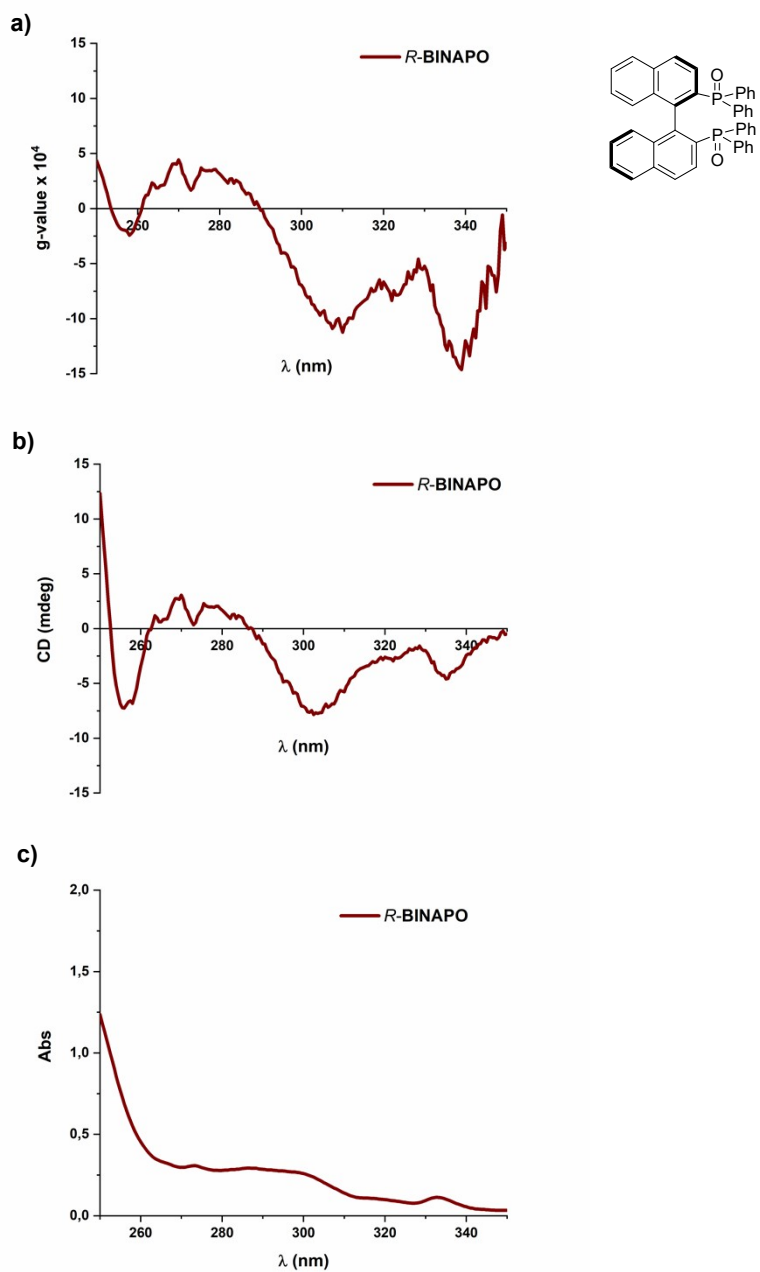

**Figure S22** a) g-value, b) CD (mdeg), and c) Abs spectra of the “chiroptical contaminant” *R*-BINAPO at a concentration equal to  $5 \times 10^{-4}$  M.

## 8. FDCD measurements

All the solutions for the FDCD measurements were prepared using as solvent a buffer solution made by dissolving 4-(2-hydroxyethyl)-1-piperazineethanesulfonic acid HEPES to a final concentration equal to 20 mM in CH<sub>3</sub>CN/H<sub>2</sub>O 3:1 and adjusting the pH to 7.4 with NaOH 1 M. The FDCD measurements were performed with a CD spectrometer Jasco J-1500 changing the position of the photomultiplier (PM) detector to a 90° geometry in respect to the direction of the excitation light source. Instead, a photodiode (PD) detector was placed at 180° geometry. The high tension (HT) voltage of the detector was adjusted for each measurements to optimize the direct current (DC) output of the instrument, corresponding to the total fluorescence of the system. To register the FDCD spectra, the following parameters were set: D.I.T. 2 sec, bandwidth 10 nm, scanning speed 50 nm/min, acquisition range 250 – 320 nm, cuvette path length 1 cm. A 420 nm high-pass filter were inserted between the sample and the PM detector to avoid the collection of scattered light from the sample.

### 8.1 FDCD titration complex **1** with *R*-methoxyphenylacetic acid *R*-MetMan

The solution for the FDCD measurements was prepared from the synthesized complex by dilution in CH<sub>3</sub>CN/H<sub>2</sub>O 3:1 with HEPES 20 mM (pH=7.4) to a final concentration of 10<sup>-4</sup> M. The solution of the acid was prepared by dilution within a solution 10<sup>-4</sup> M of complex to a concentration of the chiral acid equal to 10<sup>-2</sup> M. A defined aliquot of the acid solution was then added to the complex to obtain a H:G ratio equal to 1:24.

The binding constant ( $K=4100\text{ M}^{-1} \pm 200\text{ M}^{-1}$ ) was obtained from the fitting of the FDCD value (mdeg) registered between 300-310 nm versus the equivalent of acids added assuming a 1:1 adduct between the complex **1** and the *R*-MetMan acid (*Figure S23*). The *K* determination within this region of the spectra is not influenced by the self-absorption of the tripyridyl system that occurs at 275 nm.

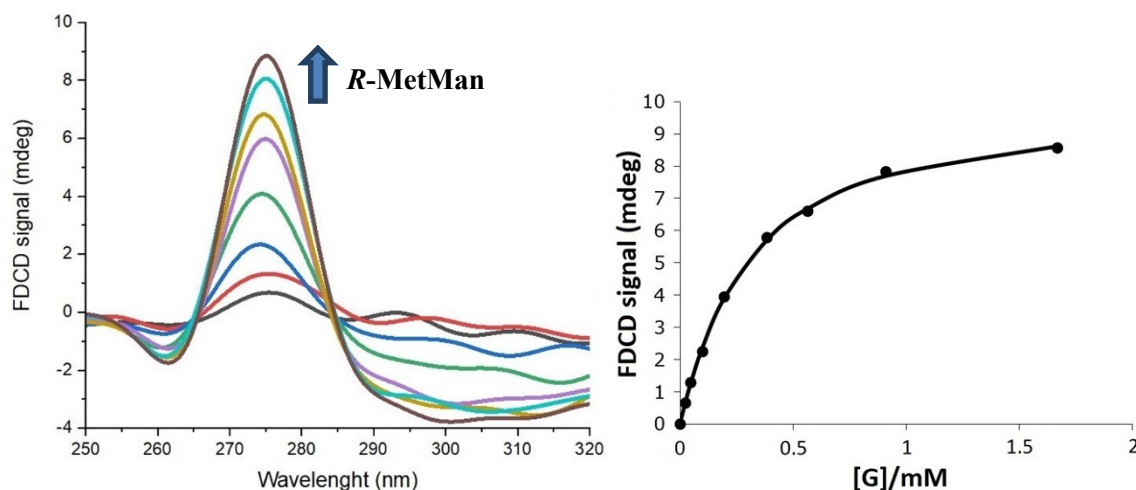

**Figure S23.** FDCD spectra (left) and fitting (right) for the *R*-MetMan·**1** host-guest titration. The analyzed solution of **1** was 10<sup>-4</sup> M with increasing concentration of *R*-MetMan as reported in the plot; the cuvette used for the measurements was 1 cm. The buffer was a 3:1 H<sub>2</sub>O/CH<sub>3</sub>CN solution in which HEPES was dissolved at a concentration of 20 mmol. The sample compartment was thermostated at 298 K. The phototube working voltage was set at 550 V. The fitting was performed considering a 1:1 binding model.

## 8.2 FDCD sensing capability

Four solutions at different concentration of the complex **1** were prepared by dilution in CH<sub>3</sub>CN/H<sub>2</sub>O 3:1 with HEPES 20 mM (pH=7.4) to a final concentration equal to 10<sup>-5</sup> M, 10<sup>-6</sup> M, and 10<sup>-7</sup> M. The solution of the acid was prepared by dilution to the desired final concentration of a chiral acid solution initially at 2,5×10<sup>-3</sup> M. For the measurements, a defined aliquot of the acid was added to the complex to obtain a concentration of the acid equal to 5×10<sup>-4</sup> M. The HT(V) of the PM detector was adjusted to 550 V and 690 V and 790 V values respectively for the 10<sup>-5</sup> M, 10<sup>-6</sup> M, and 10<sup>-7</sup> M measurements. The FDCD output were recorded with a 1 cm cuvette path length within the range 250 – 320 nm (*Figure 2a*).

## 8.3 FDCD measurements of a selected series of carboxylic acids

A solution of complex **1** were prepared by dilution in CH<sub>3</sub>CN/H<sub>2</sub>O 3:1 with HEPES 20 mM (pH=7.4) to a final concentration of 10<sup>-5</sup> M. The solution of the acid was prepared by dilution within a solution 10<sup>-5</sup> M of complex to a concentration of the chiral acid equal to 2,5×10<sup>-3</sup> M. For the measurements, a defined aliquot of the acid was added to the complex to obtain a concentration of the acid equal to 5×10<sup>-4</sup> M. The FDCD output were recorded with a 1 cm cuvette path length within the range 250 – 320 nm (*Figure 2b*).

#### 8.4 Enantiomeric excess calibration curve of MetMan acid versus FDCD amplitude

To test the limit of complex **1** to act as stereodynamic probe was tested preparing a calibration curve via FDCD with a concentration of **1** equal to  $10^{-7}$  M. Six solutions were prepared using complex **1** at  $10^{-7}$  M and the acid **MetMan**  $5 \times 10^{-4}$  M at eight different *e.e.* (+100%, +75%, +25%, -25%, -75%, -100%).

Eight curves were recorded between 260 and 280 nm and a linear relationship was obtained between the ellipticity value recorded by the FDCD spectrometer (mean value between 265 and 275 nm) and the *e.e.*(%) of the chiral acid **MetMan** (Figure S24). The measurements were repeated three times. From these, the calibration line and the confidence band were obtained from the least squares regression analysis.

a)

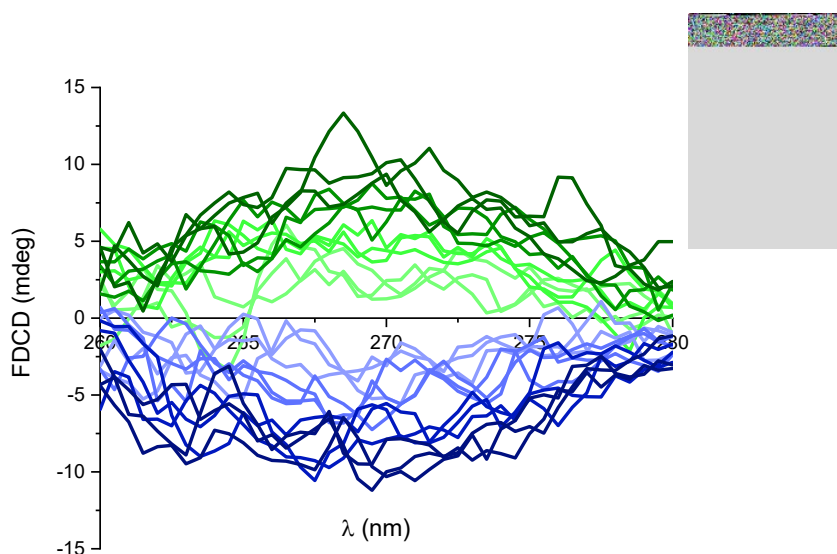

b)

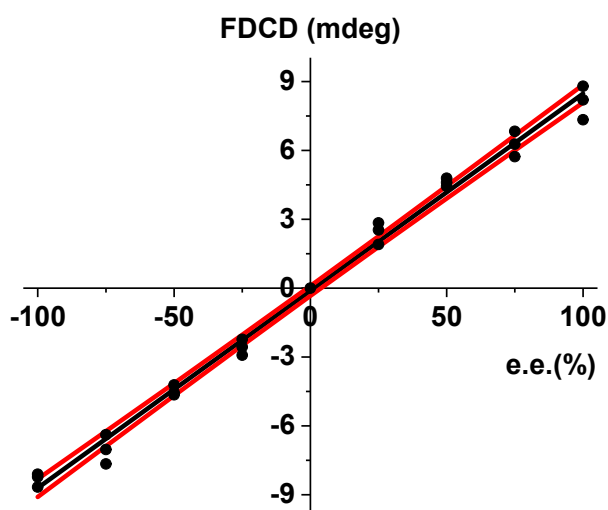

**Figure S24.** a) FDCD spectra between 260 and 280 nm of complex **1** ( $10^{-7}$  M) in the presence of **MetMan** acid ( $5 \times 10^{-4}$  M) at different enantiopurities. The HT(V) value was fixed to 750 for all the measurements. b) Calibration curves (black line) and confidence bands (red lines) of **MetMan** acid *ee*(%) with respect to the ellipticity mean value recorded between 265-275 nm. The fitting equation curve is  $y=0.086x+0.12$ ,  $R^2=0.99$ .

## 8.5 FDCD titration of complex **1** ( $10^{-5}$ M) and *R*-MetMan ( $5 \times 10^{-4}$ M) acid with *R*-BINAPO

FDCD titration of complex **1** and *R*(or *S*)-MetMan with additional aliquots of *R*-BINAPO was performed to test the influence of this interfering species on the FDCD output of the adduct *R*(or *S*)-MetMan•**1**. The same procedure adopted in section 6.5 for ECD measurement was adopted. A solution containing complex **1** ( $10^{-5}$ ) and *R*(or *S*)-MetMan ( $5 \times 10^{-4}$  M) acid was prepared by dilution from the pure compounds in CH<sub>3</sub>CN/H<sub>2</sub>O 3:1 with HEPES 20 mM (pH=7.4). The solution of *R*-BINAPO was prepared by dilution within a solution  $10^{-5}$  M of complex to a concentration of *R*-BINAPO equal to  $2 \times 10^{-3}$  M. A defined aliquot *R*-BINAPO solution was then added to the solution containing complex **1** and *R*(or *S*)-MetMan to obtain a final concentration of *R*-BINAPO equal to  $5 \times 10^{-4}$  M. The FDCD output were recorded with a 1.0 cm cuvette path length within the range 250 – 350 nm. The HT(V) of the phototube detector was fixed to 550 for all the measurements. FDCD/DC, FDCD spectra (mdeg), and DC(V) response are reported in Figure S25.

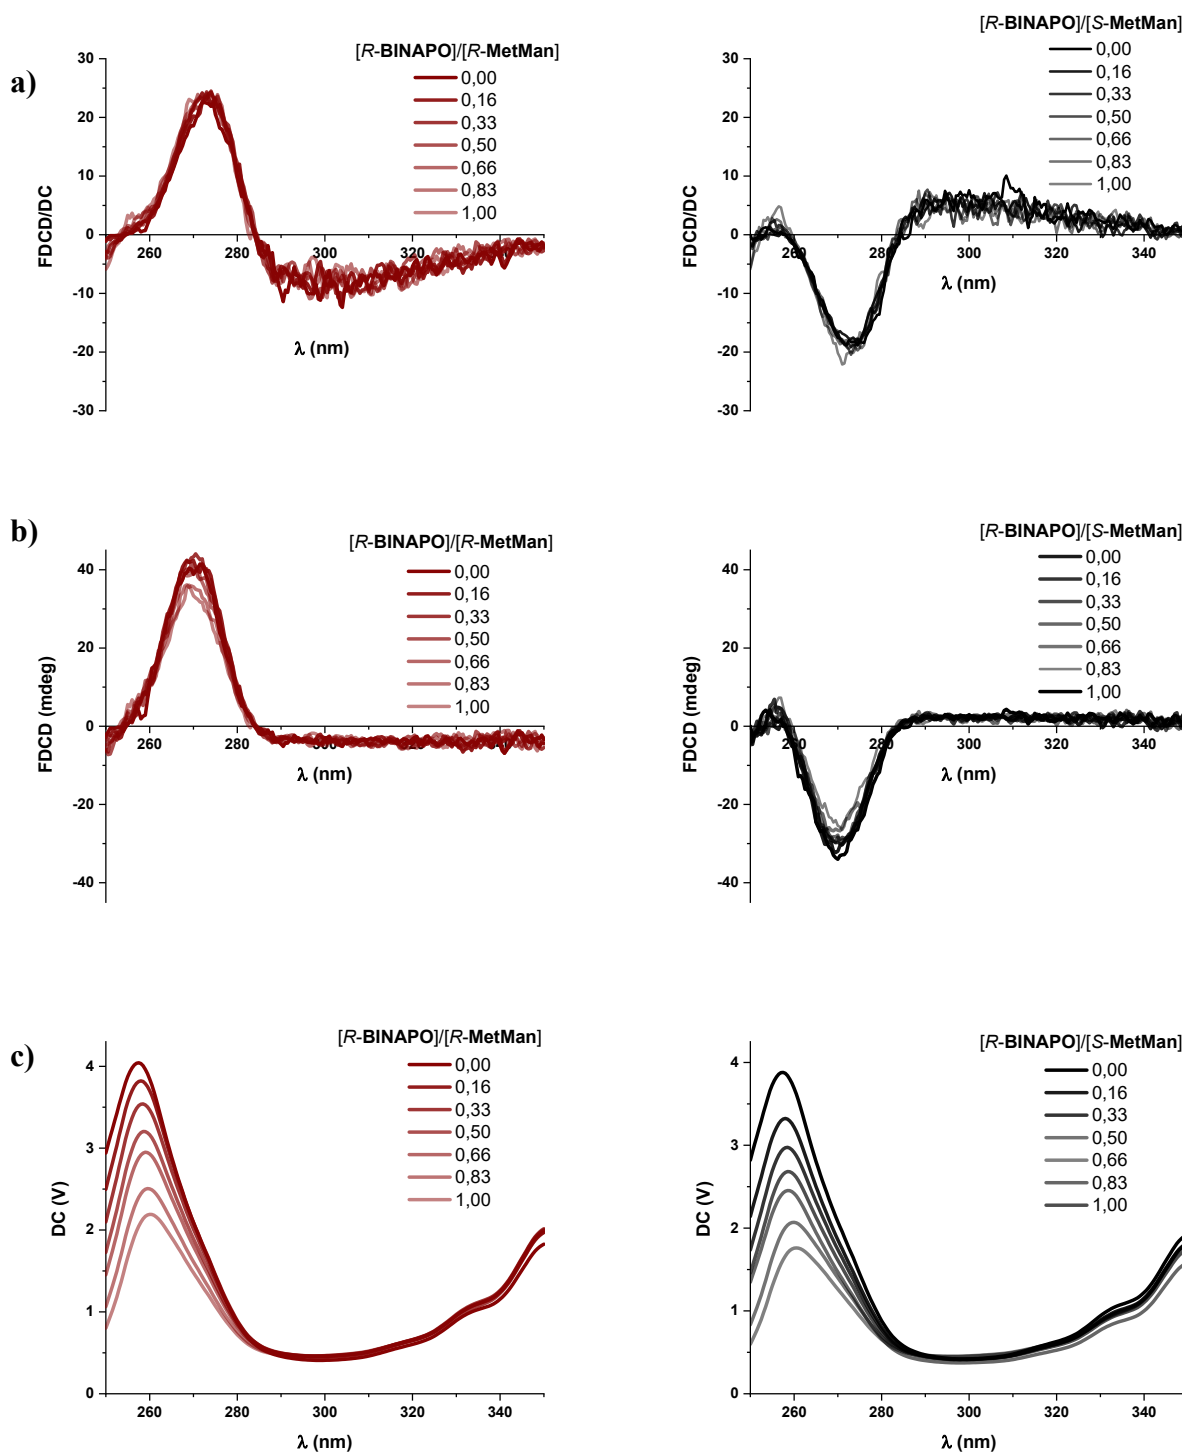

**Figure S25.** a) FDCD/DC, b) FDCD (mdeg), and c) DC (V) spectra for the titration of the host **1** ( $10^{-5}$  M) and *R*(left) or *S*(right)-MetMan acid ( $5 \times 10^{-4}$  M) with additional aliquots of *R*-BINAPO (from 0 M (solid line) to  $5 \times 10^{-4}$  M (faded line)).

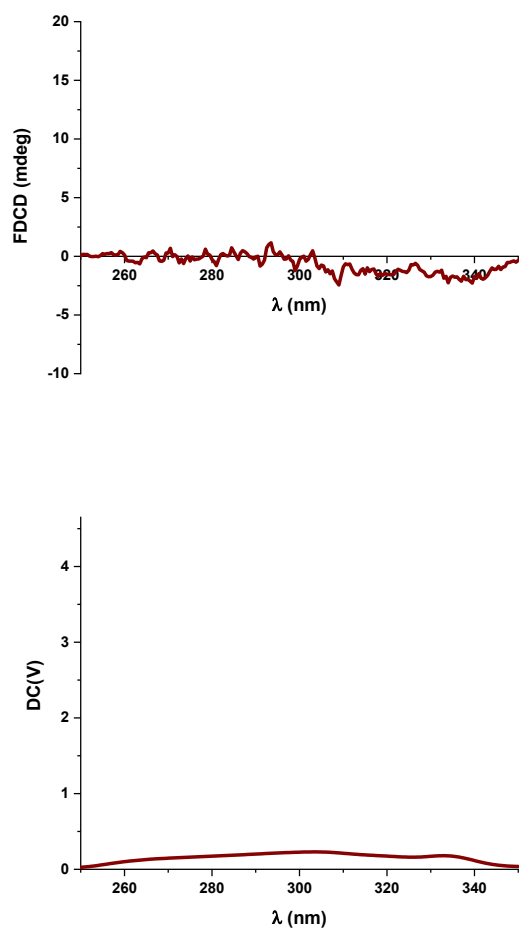

**Figure S26.** a) FDCD/DC and b) FDCD (mdeg) spectra of the “chiroptical contaminant” *R*-**BINAPO** at a concentration equal to  $5 \times 10^{-4}$  M. FDCD/DC ratio was not reported since the low value of the DC(V) makes it not reliable.

## 8.6 FDCD titration of complex **1** ( $10^{-5}$ M) and *R*-MetMan ( $5 \times 10^{-4}$ M) acid with (-)-Riboflavin

FDCD titration of complex **1** and *R*(or *S*)-MetMan with additional aliquots of (-)-Riboflavin was performed to test the influence of this fluorescence interfering species on the FDCD output of the adduct *R*(or *S*)-MetMan•**1**. A solution containing complex **1** ( $10^{-5}$ ) and *R*-MetMan ( $5 \times 10^{-4}$  M) acid was prepared by dilution from the pure compounds in CH<sub>3</sub>CN/H<sub>2</sub>O 3:1 with HEPES 20 mM (pH=7.4). The solution of (-)-Riboflavin was prepared by dilution within a solution  $10^{-5}$  M of complex to a concentration of *R*-BINAPO equal to  $2 \times 10^{-3}$  M. A defined aliquot (-)-Riboflavin solution was then added to the solution containing complex **1** and *R*(or *S*)-MetMan to obtain a final concentration of (-)-Riboflavin equal to  $5 \times 10^{-4}$  M. The FDCD output were recorded with a 1.0 cm cuvette path length within the range 250 – 350 nm. The HT(V) of the phototube detector was fixed to 550 for all the measurements. FDCD/DC, FDCD spectra (mdeg), and DC(V) response are reported in Figure S27.

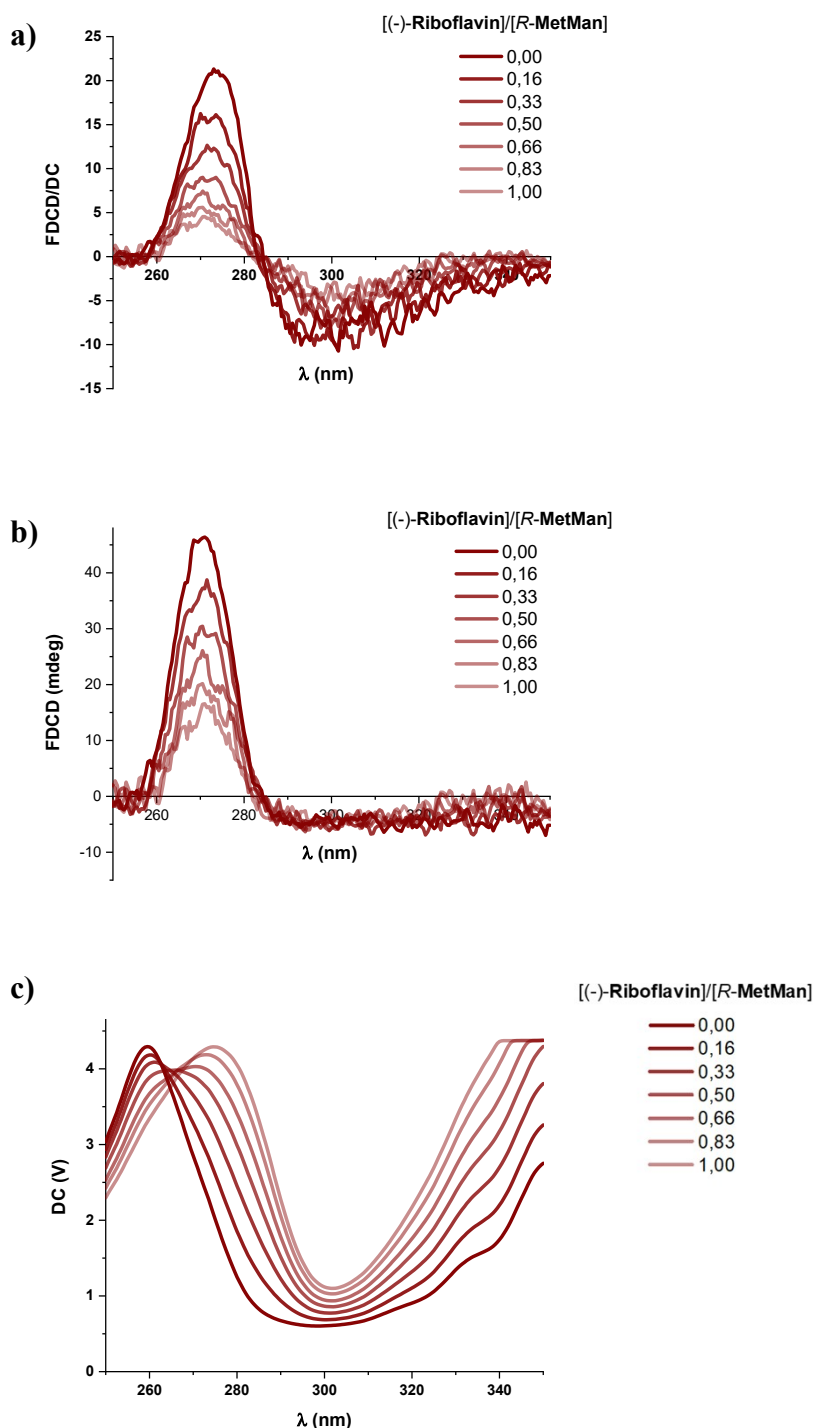

**Figure S27.** a) FDCD/DC, b) FDCD (mdeg), and c) DC (V) spectra for the titration of the host **1** ( $10^{-5}$  M) and *R*-MetMan acid ( $5 \times 10^{-4}$  M) with additional aliquots of (-)-Riboflavin (from 0 M (solid line) to  $5 \times 10^{-4}$  M (faded line)).

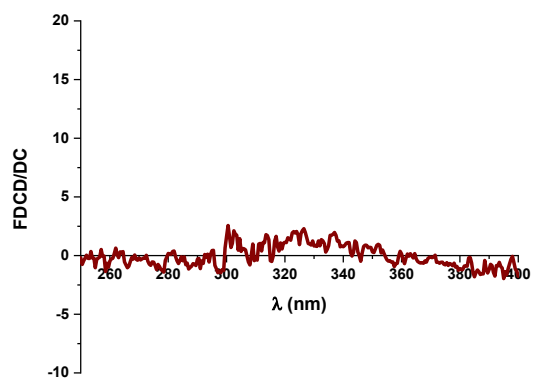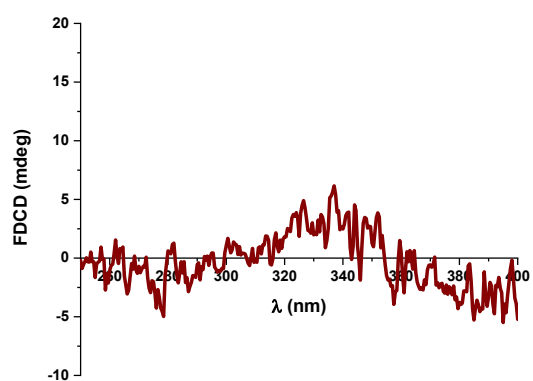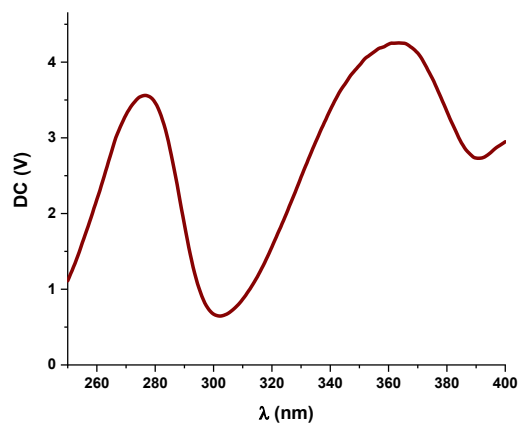

**Figure S28.** a) FDCD/DC, b) FDCD (mdeg), and c) DC(V) spectra of the “chiroptical contaminant” **(-)-Riboflavin** at a concentration equal to  $5 \times 10^{-4}$  M.

## 9. X-Ray measurements

### 9.1 Refinement Data for the species *R*-MetMan·1

Bond precision: C-C = 0.0100 Å      Wavelength= 0.71073 nm

Cell:    a= 11.0621 (6)            b= 13.6834 (7)            c= 15.7489 (8)  
          α= 77.7324 (8) β= 71.3068 (14)      γ= 68.6923 (13)

Temperature: 183 K

|                                     | Calculated                                                                                     | Reported                                                                                       |
|-------------------------------------|------------------------------------------------------------------------------------------------|------------------------------------------------------------------------------------------------|
| Volume                              | 2091.27 (19)                                                                                   | 2091.27 (19)                                                                                   |
| Space group                         | P 1                                                                                            | P 1                                                                                            |
| Hall group                          | P 1                                                                                            | P 1                                                                                            |
| Sum formula                         | C <sub>88</sub> H <sub>86</sub> Cl <sub>3</sub> N <sub>9</sub> O <sub>18</sub> Zn <sub>2</sub> | C <sub>88</sub> H <sub>86</sub> Cl <sub>3</sub> N <sub>9</sub> O <sub>18</sub> Zn <sub>2</sub> |
| Mr                                  | 1794.79                                                                                        | 1794.74                                                                                        |
| Dx, g cm <sup>-3</sup>              | 1.425                                                                                          | 1.425                                                                                          |
| Z                                   | 1                                                                                              | 1                                                                                              |
| Mu (mm <sup>-1</sup> )              | 0.745                                                                                          | 0.745                                                                                          |
| F000                                | 932.0                                                                                          | 932.0                                                                                          |
| F000'                               | 933.39                                                                                         |                                                                                                |
| h, k, l <sub>max</sub>              | 13,16,19                                                                                       | 13,16,19                                                                                       |
| Nref                                | 15586 [7793]                                                                                   | 34921                                                                                          |
| T <sub>min</sub> , T <sub>max</sub> | 0.844, 0.963                                                                                   | 0.682, 0.887                                                                                   |
| T <sub>min</sub> '                  | 0.753                                                                                          |                                                                                                |
| Reported T Limits:                  | T <sub>min</sub> = 0.682                                                                       | T <sub>max</sub> = 0.887                                                                       |
| AbsCorr = MULTI-SCAN                |                                                                                                |                                                                                                |
| Data completeness= 4.48/2.24        |                                                                                                | θ (max)= 25.507                                                                                |
| R(reflections)= 0.0418 (32708)      |                                                                                                | wR2(reflections)= 0.1007 (34921)                                                               |
| S = 1.034                           |                                                                                                | Npar= 1091                                                                                     |

## 9.2 Coordinates of the Atoms within the Unit Cell

|    |          |          |          |
|----|----------|----------|----------|
| Zn | 5.43935  | 3.71906  | 3.3761   |
| O  | 7.39307  | 3.45254  | 3.29958  |
| O  | 7.73342  | 4.59852  | 5.1859   |
| O  | 10.38511 | 3.84486  | 5.13696  |
| N  | 3.34339  | 4.39922  | 3.69108  |
| N  | 4.48613  | 2.88465  | 1.72171  |
| N  | 5.55402  | 5.82316  | 3.2017   |
| N  | 4.95157  | 2.72667  | 5.12361  |
| C  | 2.75692  | 4.47466  | 2.36531  |
| H  | 2.97298  | 5.35347  | 1.96195  |
| H  | 12.83432 | 4.4074   | 2.43798  |
| C  | 3.26791  | 3.37127  | 1.46219  |
| C  | 2.49886  | 2.92632  | 4.02E-08 |
| H  | 1.62241  | 3.26386  | 2.60E-08 |
| C  | 8.0886   | 3.5948   | 14.38319 |
| H  | 7.59473  | 3.28814  | 13.63133 |
| C  | 9.35304  | 3.09223  | 14.63678 |
| H  | 9.73819  | 2.4473   | 14.05546 |
| C  | 5.00566  | 1.91451  | 9.18E-08 |
| C  | 6.3223   | 1.35086  | 1.30055  |
| C  | 7.47582  | 1.66429  | 5.77E-08 |
| C  | 12.51633 | 4.11415  | 14.23638 |
| H  | 11.6898  | 4.46649  | 13.92644 |
| C  | 13.64178 | 4.40505  | 13.56312 |
| H  | 13.59468 | 4.94146  | 12.78012 |
| C  | 14.90197 | 3.918    | 14.00504 |
| H  | 15.6937  | 4.13871  | 13.52901 |
| C  | 9.91875  | 1.51677  | 2.77E-08 |
| H  | 10.76191 | 1.19628  | 5.75E-08 |
| C  | 8.73973  | 1.1686   | 9.98E-08 |
| C  | 8.80432  | 3.39E-08 | 2.13101  |
| H  | 14.62138 | 12.776   | 2.43353  |
| C  | 12.63177 | 12.71318 | 2.81465  |
| C  | 12.69677 | 11.77455 | 3.90611  |
| H  | 13.53729 | 11.4274  | 4.18194  |
| C  | 11.56513 | 11.38604 | 4.53785  |
| H  | 11.61904 | 10.75467 | 5.24522  |
| C  | 10.3113  | 11.89745 | 4.16711  |
| H  | 9.53126  | 11.61935 | 4.63127  |
| C  | 10.20978 | 12.79589 | 3.13942  |
| H  | 4.38316  | 3.86E-08 | 2.89918  |
| C  | 6.39167  | 4.82E-08 | 2.42315  |
| C  | 14.47573 | 5.72854  | 4.34061  |
| H  | 14.55582 | 5.61401  | 5.32085  |
| H  | 13.64514 | 6.23347  | 4.15524  |
| C  | 4.58638  | 6.49097  | 3.82899  |
| C  | 4.6903   | 7.87808  | 4.05144  |
| H  | 15.07017 | 8.34257  | 4.52153  |
| C  | 5.788    | 8.54689  | 3.58134  |
| H  | 5.86931  | 9.48335  | 3.71629  |
| C  | 6.77549  | 7.85558  | 2.91401  |

|    |          |          |          |
|----|----------|----------|----------|
| H  | 7.53919  | 8.31097  | 2.57886  |
| C  | 6.6391   | 6.48402  | 2.7405   |
| H  | 7.32164  | 6.00108  | 2.2882   |
| C  | 2.69111  | 3.4034   | 4.55119  |
| H  | 2.30911  | 2.68281  | 3.98915  |
| H  | 13.01044 | 3.83241  | 5.0465   |
| C  | 3.67882  | 2.80526  | 5.53884  |
| C  | 3.27661  | 2.30607  | 6.76673  |
| H  | 13.4323  | 2.37977  | 7.04404  |
| C  | 4.21034  | 1.70025  | 7.57939  |
| H  | 3.95661  | 1.35982  | 8.42912  |
| C  | 5.53147  | 1.59023  | 7.14488  |
| H  | 6.19097  | 1.16855  | 7.6832   |
| C  | 5.84798  | 2.11475  | 5.91551  |
| H  | 6.74469  | 2.04052  | 5.61002  |
| C  | 8.13446  | 3.97207  | 4.2027   |
| C  | 9.64403  | 3.80265  | 3.94763  |
| H  | 9.80185  | 2.92452  | 3.49533  |
| C  | 10.08406 | 4.92406  | 3.02375  |
| C  | 10.67936 | 6.06661  | 3.50423  |
| H  | 10.85568 | 6.16184  | 4.43256  |
| C  | 11.02023 | 7.08642  | 2.60704  |
| H  | 11.4101  | 7.88861  | 2.93625  |
| C  | 10.80173 | 6.94525  | 1.25903  |
| H  | 11.05024 | 7.63802  | 6.58E-08 |
| C  | 10.21747 | 5.78678  | 7.84E-08 |
| H  | 15.12092 | 7.30029  | 14.68275 |
| C  | 9.84518  | 4.79131  | 1.65943  |
| H  | 9.42184  | 4.00825  | 1.33021  |
| C  | 10.26868 | 2.62761  | 5.87251  |
| H  | 10.50045 | 1.87193  | 5.29267  |
| H  | 9.34621  | 2.52467  | 6.18986  |
| H  | 10.87696 | 2.64906  | 6.63919  |
| Zn | 16.0933  | 10.18693 | 11.36063 |
| O  | 18.02923 | 10.45771 | 11.51219 |
| O  | 7.29569  | 9.20826  | 9.68222  |
| O  | 9.97901  | 9.86993  | 9.70595  |
| N  | 13.98875 | 9.54438  | 11.06434 |
| N  | 15.15482 | 11.02645 | 13.03963 |
| N  | 16.15534 | 8.06243  | 11.54778 |
| N  | 15.60428 | 11.12264 | 9.57396  |
| C  | 13.40619 | 9.44859  | 12.41382 |
| H  | 13.62758 | 8.56593  | 12.80533 |
| H  | 12.42035 | 9.51715  | 12.35302 |
| C  | 13.93275 | 10.54496 | 13.31101 |
| C  | 13.19592 | 10.98231 | 14.39505 |
| H  | 12.3243  | 10.64018 | 14.55373 |
| C  | 8.69747  | 10.29997 | 4.15E-08 |
| H  | 8.21991  | 10.60393 | 1.17747  |
| C  | 9.94436  | 10.78095 | 1.28E-08 |
| H  | 10.34114 | 11.41585 | 7.10E-08 |
| C  | 15.68491 | 11.98989 | 13.84043 |
| C  | 16.98623 | 12.57788 | 13.43558 |

|   |          |          |          |
|---|----------|----------|----------|
| C | 18.16058 | 12.31771 | 14.18003 |
| C | 13.1111  | 9.90504  | 5.46E-08 |
| H | 12.30242 | 9.51125  | 8.50E-08 |
| C | 14.258   | 9.71793  | 1.24717  |
| H | 14.23571 | 9.21184  | 2.05093  |
| C | 4.42552  | 10.2644  | 8.01E-08 |
| H | 5.21841  | 10.11657 | 1.30204  |
| C | 9.51807  | 12.60727 | 14.50776 |
| H | 10.34836 | 12.96571 | 14.21858 |
| C | 19.40132 | 12.85017 | 13.73366 |
| C | 19.44185 | 13.62249 | 12.5903  |
| H | 9.21883  | 13.93594 | 12.27443 |
| C | 18.28536 | 13.95461 | 11.88589 |
| C | 13.35331 | 2.09432  | 10.77219 |
| H | 14.18764 | 2.44671  | 10.48598 |
| C | 12.21178 | 2.44899  | 10.11079 |
| H | 12.24919 | 3.03933  | 9.36635  |
| C | 10.97319 | 1.92432  | 10.54678 |
| H | 10.178   | 2.18205  | 10.09448 |
| C | 15.86053 | 13.81506 | 11.5893  |
| H | 15.01314 | 13.46659 | 11.8414  |
| C | 17.02445 | 13.42546 | 12.31595 |
| C | 14.04263 | 8.24224  | 10.38366 |
| H | 14.16971 | 8.38197  | 9.41232  |
| H | 13.18705 | 7.76478  | 10.51712 |
| C | 15.17701 | 7.40673  | 10.92642 |
| C | 15.23636 | 6.04908  | 10.6936  |
| H | 14.52664 | 5.60249  | 10.24723 |
| C | 16.34235 | 5.35612  | 11.11772 |
| H | 5.34861  | 4.42325  | 10.9457  |
| C | 6.28986  | 6.00984  | 11.79098 |
| H | 7.04754  | 5.53945  | 12.11723 |
| C | 17.22274 | 7.36469  | 11.97487 |
| H | 6.85732  | 7.82945  | 12.42421 |
| C | 13.34696 | 10.57819 | 10.23685 |
| H | 13.04542 | 11.32684 | 10.81075 |
| H | 12.55276 | 10.19691 | 9.78158  |
| C | 14.33016 | 11.08287 | 9.21064  |
| C | 13.92025 | 11.53739 | 7.95902  |
| H | 13.00391 | 11.50359 | 7.70841  |
| C | 14.86796 | 12.03474 | 7.08705  |
| H | 14.61206 | 12.33801 | 6.22397  |
| C | 16.17885 | 12.09112 | 7.4741   |
| H | 16.84615 | 12.4407  | 6.89426  |
| C | 16.50656 | 11.62611 | 8.73461  |
| H | 17.41406 | 11.66793 | 9.01192  |
| C | 7.69973  | 9.87544  | 10.62983 |
| C | 9.20804  | 10.05712 | 10.88045 |
| H | 9.37787  | 10.96966 | 11.25119 |
| C | 9.62714  | 9.01539  | 11.89182 |
| C | 9.40718  | 9.25027  | 13.24576 |
| H | 9.01619  | 10.07083 | 13.52159 |
| C | 9.7493   | 8.30433  | 14.18892 |

|    |          |          |          |
|----|----------|----------|----------|
| H  | 4.53444  | 6.84833  | 2.80E-08 |
| C  | 10.33611 | 7.11432  | 13.79891 |
| H  | 10.59512 | 6.47152  | 14.44844 |
| C  | 10.54074 | 6.86911  | 12.45535 |
| H  | 10.9203  | 6.04249  | 12.18248 |
| C  | 10.19901 | 7.81375  | 11.50032 |
| H  | 10.35673 | 7.6379   | 10.58089 |
| C  | 9.82372  | 10.93811 | 8.77317  |
| H  | 10.36544 | 10.75661 | 7.97682  |
| H  | 10.11734 | 11.77616 | 9.18543  |
| H  | 8.88014  | 11.01201 | 8.51662  |
| Cl | 6.38758  | 12.4713  | 3.6761   |
| O  | 1.18784  | 8.25E-08 | 2.80575  |
| O  | 7.14217  | 12.92399 | 4.81071  |
| O  | 16.20572 | 11.90718 | 4.09296  |
| O  | 7.13907  | 11.43975 | 3.02523  |
| Cl | 7.07903  | 1.76849  | 10.80719 |
| O  | 12.18425 | 13.73891 | 12.00008 |
| O  | 7.75802  | 1.10304  | 9.75192  |
| O  | 5.71749  | 1.99422  | 10.44001 |
| O  | 7.69814  | 3.03984  | 11.05989 |
| Cl | 12.81763 | 7.8088   | 6.84162  |
| O  | 12.56757 | 6.48619  | 7.02328  |
| O  | 12.47771 | 8.14309  | 5.49435  |
| O  | 14.1892  | 8.03684  | 7.02773  |
| O  | 12.04802 | 8.59345  | 7.74548  |
| N  | 8.01172  | 6.3863   | 7.35694  |
| H  | 8.07308  | 5.75799  | 6.71779  |
| C  | 8.93395  | 7.51559  | 7.18047  |
| H  | 9.86141  | 7.17069  | 7.15081  |
| H  | 8.86152  | 8.11408  | 7.96644  |
| C  | 8.6741   | 8.314    | 5.93776  |
| H  | 8.54158  | 7.70457  | 5.17997  |
| H  | 9.43953  | 8.89718  | 5.75684  |
| H  | 7.86962  | 8.85923  | 6.06232  |
| C  | 6.57512  | 6.76068  | 7.46965  |
| H  | 6.45224  | 7.26114  | 8.31493  |
| H  | 6.35799  | 7.37796  | 6.72669  |
| C  | 5.61276  | 5.66431  | 7.44592  |
| H  | 5.74784  | 5.12712  | 6.63771  |
| H  | 4.70236  | 6.02906  | 7.44741  |
| H  | 5.73934  | 5.10083  | 8.23782  |
| C  | 9.75508  | 5.11459  | 8.6664   |
| H  | 10.37075 | 5.87734  | 8.63525  |
| H  | 9.90091  | 4.54319  | 7.88339  |
| H  | 9.91649  | 4.59849  | 9.4835   |
| C  | 8.3614   | 5.60618  | 8.66195  |
| H  | 8.22512  | 6.20147  | 9.44198  |
| H  | 7.74587  | 4.83766  | 8.75686  |

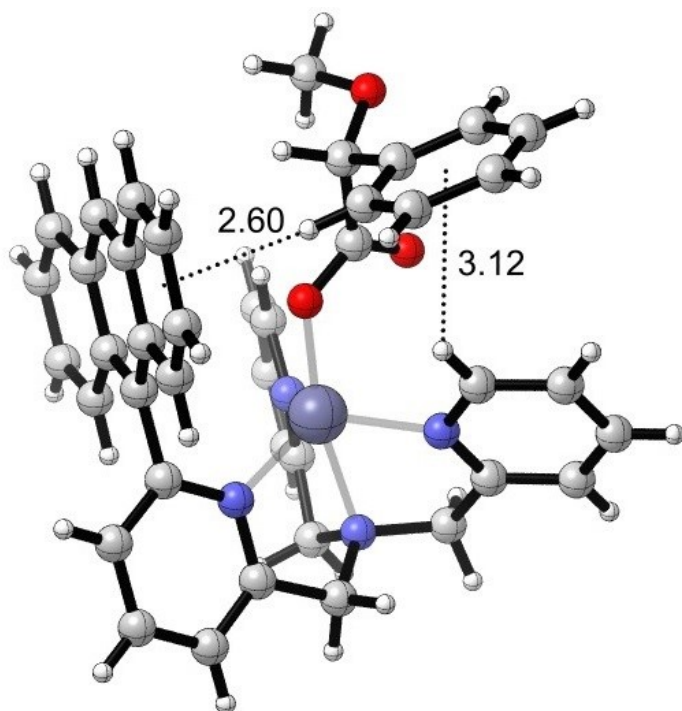

**Figure S29.** X-ray crystallographic structure of the complex ***R*-MetMan·1** between (*R*)-(-)-Methoxyphenylacetic ***R*-MetMan** acid and the stereodynamic probe based on Zn(II)-TPMA **1**.

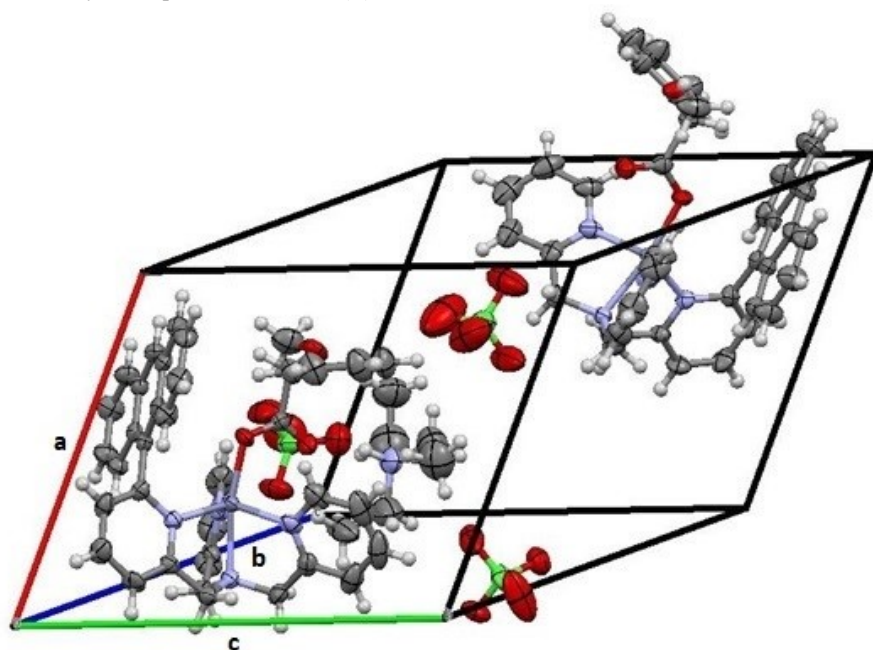

**Figure S30.** 3-D Crystal packing of ***R*-MetMan·1** molecule. One unit cell with two molecules of complex ***R*-MetMan·1** is displayed. Unit cell parameters are: space group P1, volume ( $\text{\AA}^3$ ): 2091.27(19);  $a(\text{\AA})$ : 11.0621 (6),  $b(\text{\AA})$ : 13.6834(7),  $c(\text{\AA})$ : 15.7489(8);  $\alpha(^{\circ})=77.7324$  (8),  $\beta(^{\circ})=71.3068^{\circ}$  (14),  $\gamma(^{\circ})=68.6923$  (13). Ellipsoids at the 50 % probability level are used.

## 10.DFT Calculation

Geometry of (*R*)-MetMan•**1** complex has been optimized at M06/6-311+g(d,p) level starting from the X-ray structure obtaining conformer **A**. Other possible orientations of the (*R*)-metoxymandelic carboxylate within the host **1** have been considered, thus obtaining two other stable structures, one with a different orientation of the OCH<sub>3</sub> group (**B**), another one with the phenyl group pointing in opposite direction with respect to the former cases and with even higher energy (**C**), see *Figure S31*. Conformers **A**, **B** and **C** have Boltzmann populations of 77%, 19% and 4% respectively. The first two structures give quite similar calculated ECD spectra, while the lowest energy features of case **C** (consisting of three spectral components) have opposite sign with respect to **A** and **B** (see *Figure S32*). The average spectrum weighted with the Boltzmann population of three conformers is reported in *Figure S33*. The calculated spectra, in particular for the most populated conformer **A**, have been analyzed in term of electronic transitions responsible of CD and absorption bands as reported in *Table S1* and *Figure S34*. Molecular orbitals associated to the first three transitions are reported in *Figure S35*.

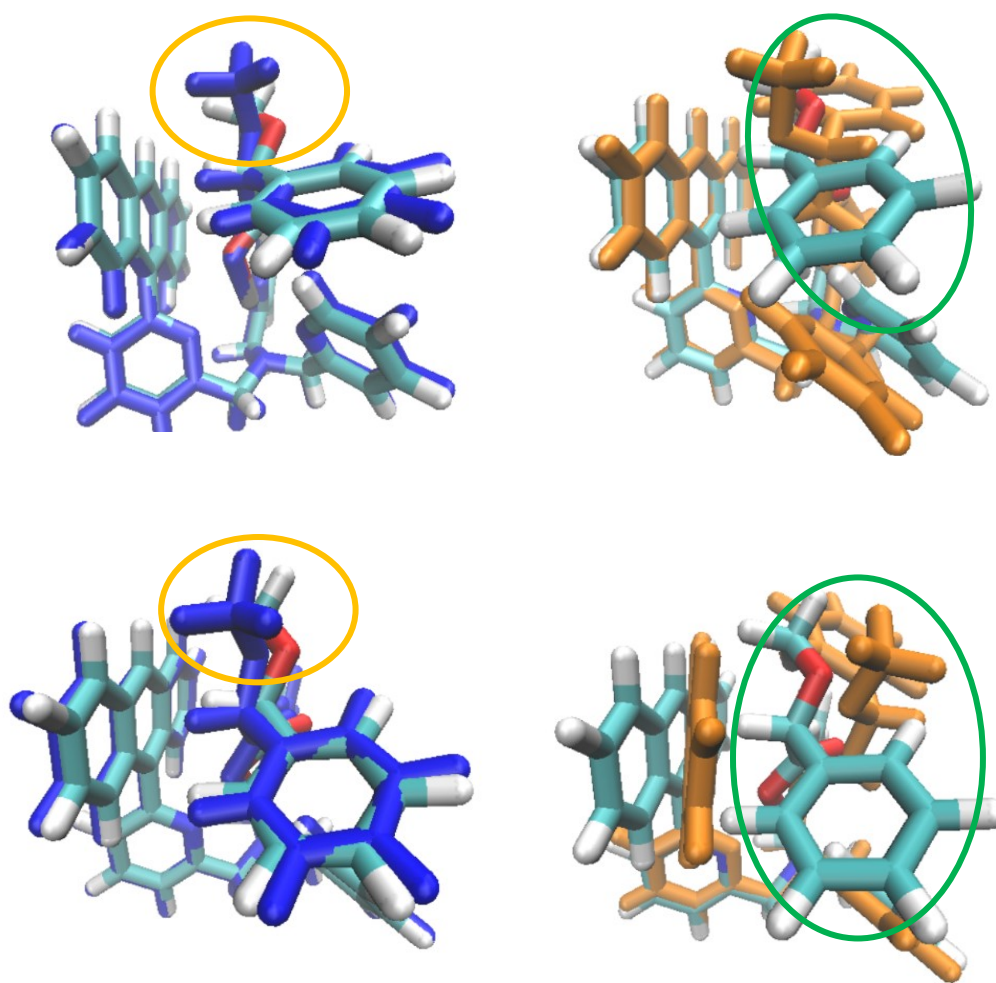

**Figure S31.** Host **1** and guests (*R*)-MetMan: superposition of structures **A**, **B** and **C**. Top left, structures **A** and **B** (blue); top right, structures **A** and **C** (orange) aligning the anthryl moiety. Bottom left, structures **A** and **B** (blue); bottom right, structures **A** and **C** (orange), as seen by aligning the N atoms of the tris(2-pyridylmethyl)amine.<sup>[2]</sup>

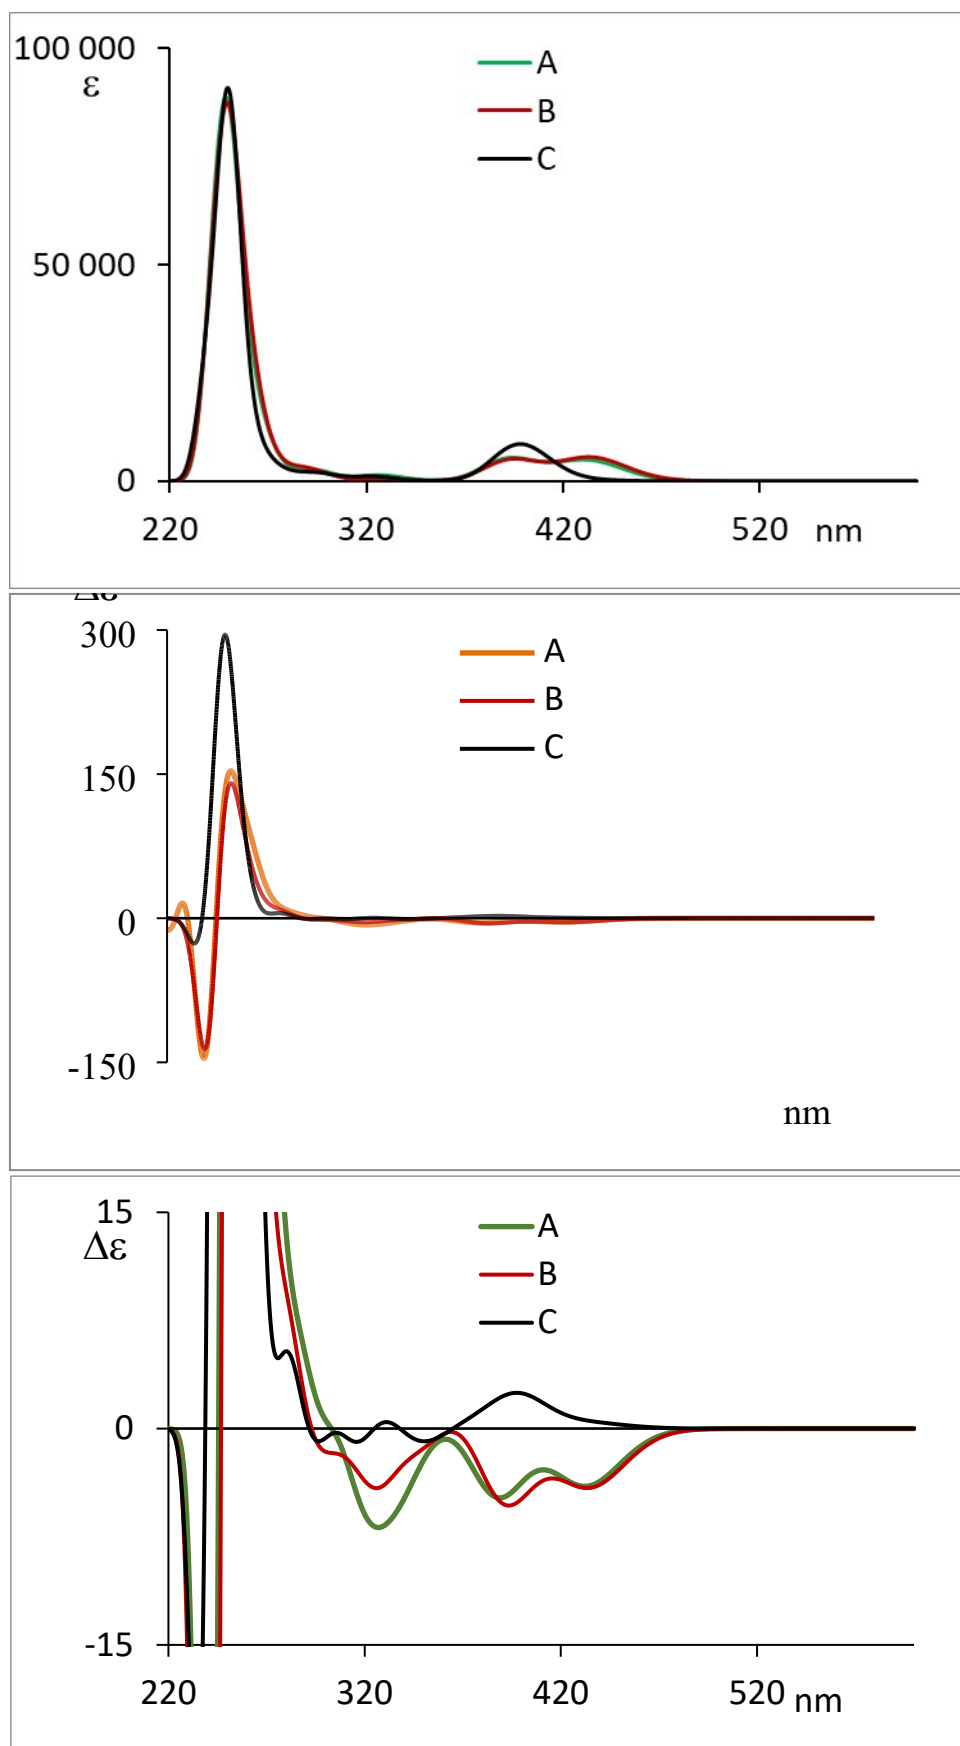

**Figure S32.** Calculated absorption and CD spectra of the three populated conformer of host **1** and guests (*R*)-**MetMan**, with 0.16 eV Gaussian bandwidth (calculated at M06/6-311+g(d,p) level).

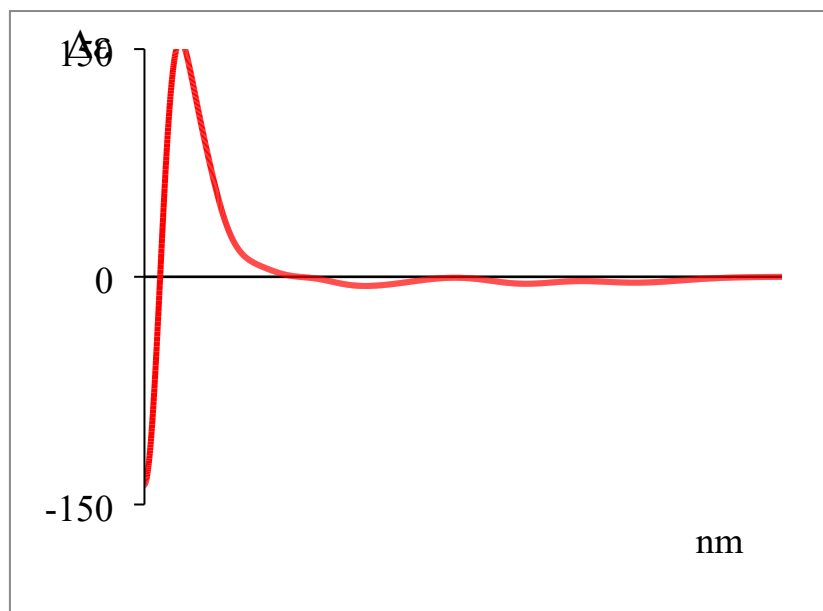

**Figure S33.** Calculated CD spectrum of *R*-MetMan hosted in **1** as Boltzmann weighed average of three most populated conformers.

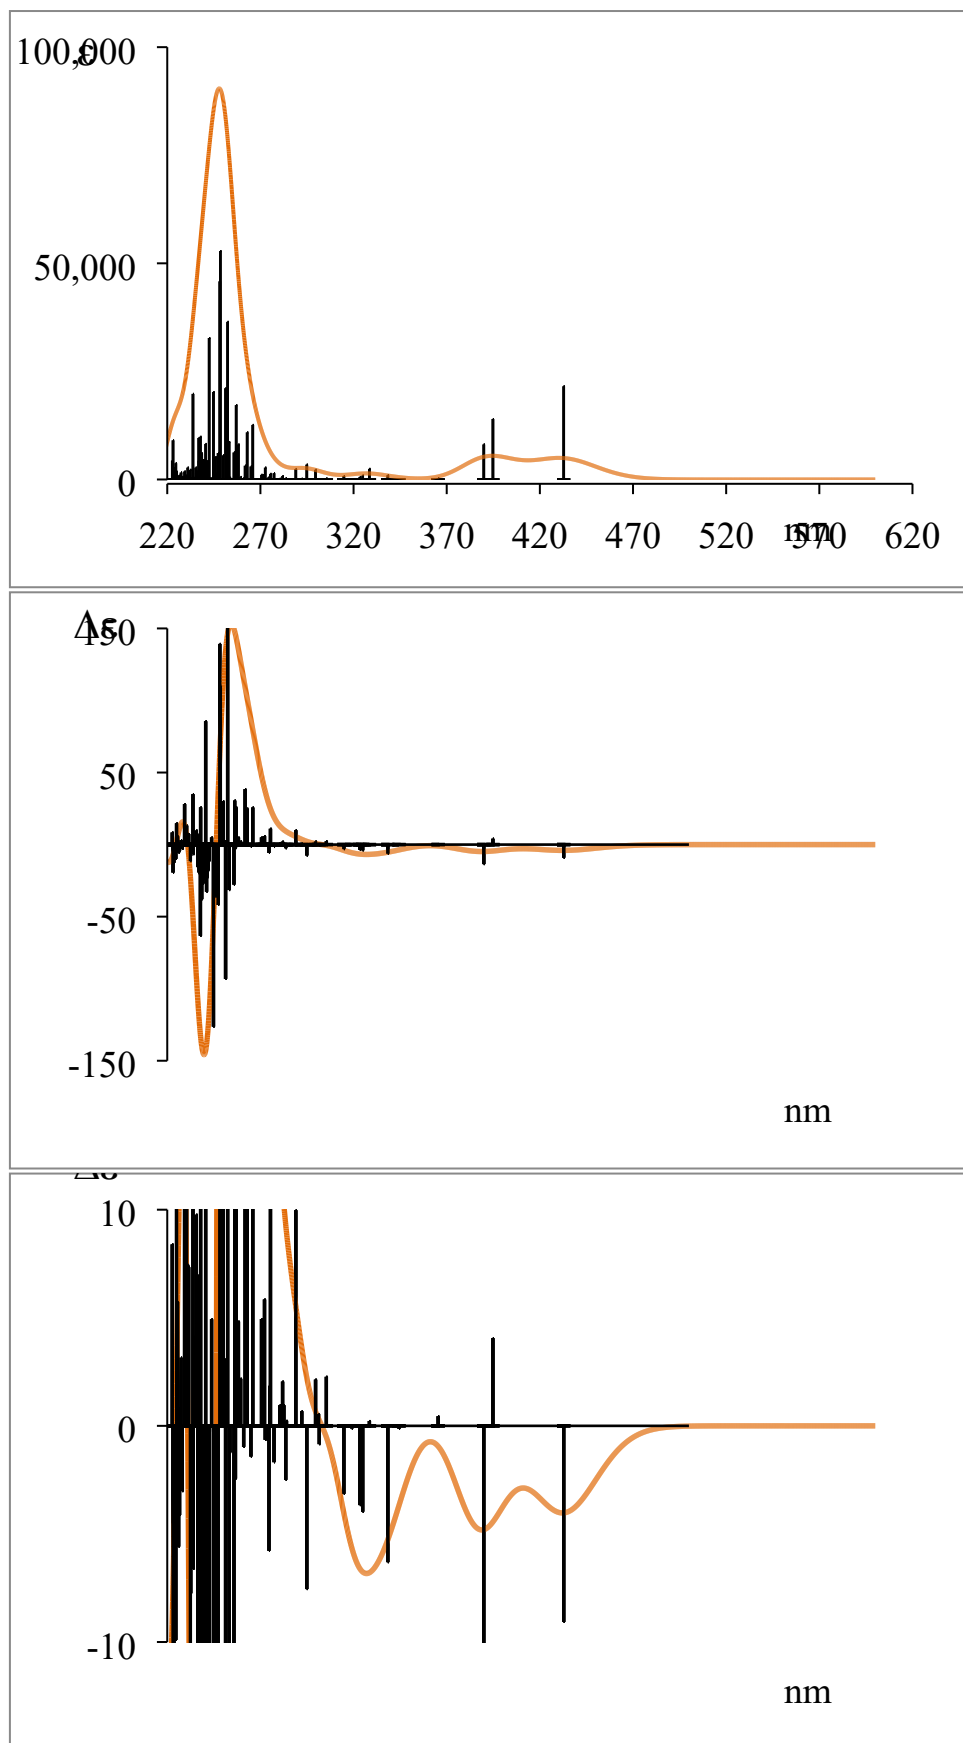

**Figure S34.** Calculated absorption and CD spectra of conformer A of host **1** and guests (*R*)-MetMan.

**Table S1.** Characteristics of the main transitions for the complex host **1** and guests (**R**)-MetMan:

Transition energy (eV) and wavelength (nm), dipole and rotational strength (10<sup>-40</sup> esu<sup>2</sup>cm<sup>2</sup>), angle between electric and magnetic dipole transition moments (E-M in degrees), transition assignment, for each orbital the principal moiety contribution is given, moieties are defined in the figure below.

|    | eV   | nm  | D      | R       | E-M |                          |       |
|----|------|-----|--------|---------|-----|--------------------------|-------|
| 1  | 2.87 | 433 | 40221  | -9.03   | 94  | 181(A) → 182(Py1,A)      | 0.68  |
| 2  | 3.14 | 395 | 23848  | 4.07    | 87  | 181(A) → 183(Py2)        | 0.50  |
| 3  | 3.18 | 390 | 14179  | -13.52  | 103 | 181(A) → 183(Py2)        | 0.47  |
| 6  | 3.66 | 338 | 2015   | -6.31   | 126 | 180(PhAc) → 182(Py1,A)   | 0.67  |
| 16 | 4.20 | 295 | 6460   | -7.54   | 97  | 179(PhAc) → 185(Py3)     | 0.56  |
| 18 | 4.29 | 289 | 4672   | 9.98    | 76  | 178(A) → 183(Py2)        | 0.64  |
| 25 | 4.50 | 275 | 2519   | 11.00   | 53  | 181(A) → 191(Py1)        | 0.60  |
| 33 | 4.66 | 266 | 24486  | 25.75   | 81  | 176(PhAc,A) → 184(A,Py1) | 0.46  |
| 35 | 4.72 | 263 | 21248  | 24.87   | 77  | 178(A) → 186(Py1)        | 0.46  |
| 46 | 4.91 | 252 | 70650  | 169.75  | 69  | 173(PhAc) → 182(Py1,A)   | 0.24  |
| 48 | 4.93 | 251 | 41799  | -93.16  | 109 | 173(PhAc) → 182(Py1,A)   | 0.47  |
| 49 | 4.96 | 250 | 10738  | 30.10   | 60  | 181(A) → 196(A,Pyx)      | 0.49  |
| 50 | 4.99 | 248 | 103526 | 109.78  | 81  | 178(A) → 187(Py2)        | -0.32 |
| 51 | 5.00 | 248 | 89477  | 139.09  | 78  | 177(PhAc) → 186(Py1)     | 0.48  |
| 52 | 5.01 | 247 | 12413  | -41.98  | 117 | 174 → 183(Py2)           | 0.54  |
| 54 | 5.04 | 246 | 10252  | -36.27  | 104 | 181(A) → 198             | 0.28  |
| 55 | 5.05 | 246 | 3239   | -12.21  | 134 | 181(A) → 198             | 0.39  |
| 56 | 5.06 | 245 | 39157  | -126.26 | 112 | 171 → 182(Py1,A)         | 0.34  |
|    |      |     |        |         |     | 175(A,PhAc) → 185(Py3)   | 0.24  |
|    |      |     |        |         |     | 175(A,PhAc) → 185(Py3)   | 0.28  |

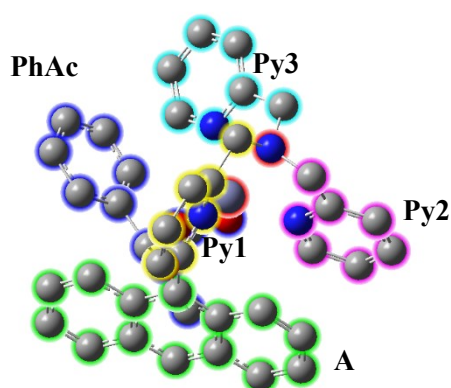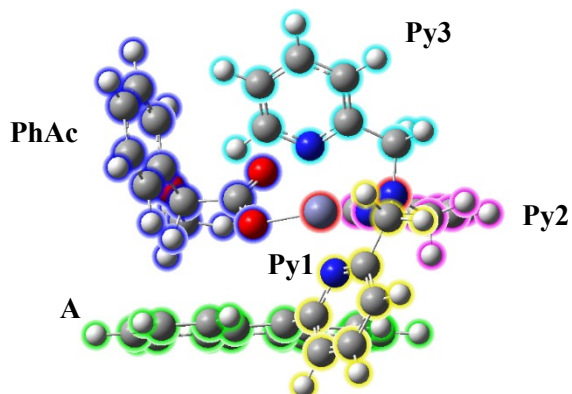

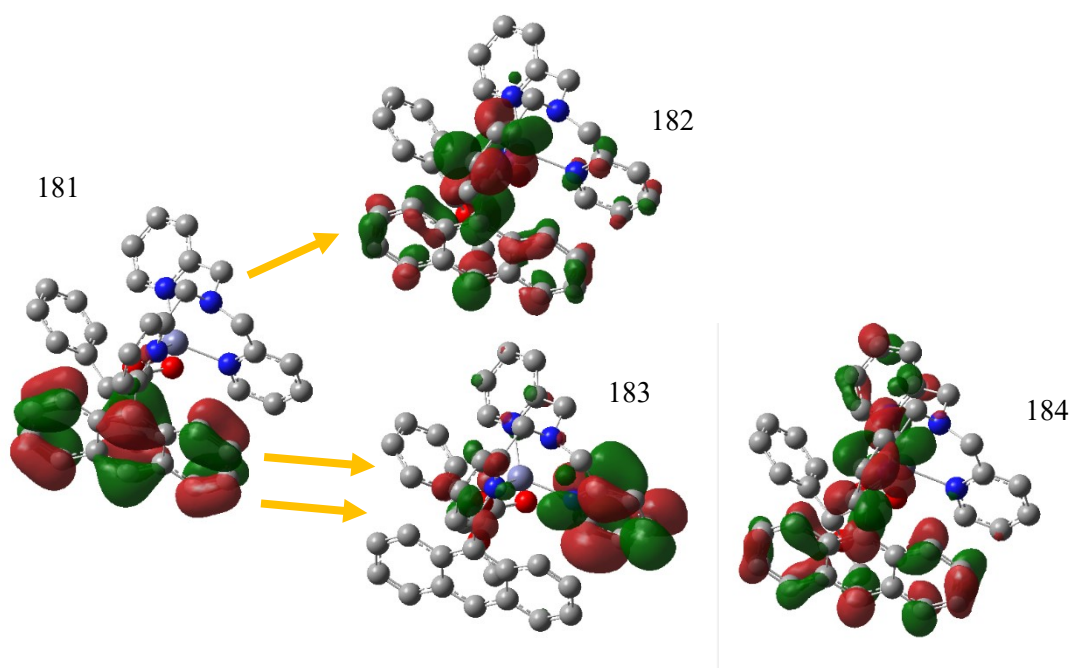

**Figure S35.** Molecular orbitals associated to the first three transitions (same orbital numbering as used in the *Table S1* above).

## 11. References

- [1] M. J. Frisch , G. W. Trucks , H. B. Schlegel , G. E. Scuseria , M. A. Robb , J. R. Cheeseman , G. Scalmani, V. Barone , G. A. Petersson , H. Nakatsuji , X. Li , M. Caricato , A. V. Marenich , J. Bloino , B. G. Janesko , R. Gomperts , B. Mennucci , H. P. Hratchian , J. V. Ortiz , A. F. Izmaylov , J. L. Sonnenberg , D. Williams-Young , F. Ding , F. Lipparini , F. Egidi , J. Goings , B. Peng , A. Petrone , T. Henderson , D. Ranasinghe , V. G. Zakrzewski , J. Gao , N. Rega , G. Zheng , W. Liang , M. Hada , M. Ehara , K. Toyota , R. Fukuda , J. Hasegawa , M. Ishida , T. Nakajima , Y. Honda , O. Kitao , H. Nakai , T. Vreven , K. Throssell , J. A. Montgomery, Jr. , J. E. Peralta , F. Ogliaro , M. J. Bearpark , J. J. Heyd , E. N. Brothers , K. N. Kudin , V. N. Staroverov , T. A. Keith , R. Kobayashi , J. Normand , K. Raghavachari , A. P. Rendell , J. C. Burant , S. S. Iyengar , J. Tomasi , M. Cossi , J. M. Millam , M. Klene , C. Adamo , R. Cammi , J. W. Ochterski , R. L. Martin , K. Morokuma , O. Farkas , J. B. Foresman and D. J. Fox , Gaussian 16, Revision C.01 , Gaussian, Inc., Wallingford CT, 2016
